1       **The selective autophagy receptors Optineurin and p62 are both required for**  
2                   **innate host defense against mycobacterial infection**

3       Rui Zhang<sup>1</sup>, Monica Varela<sup>1</sup>, Wies Vallentgoed<sup>1</sup>, Michiel van der Vaart<sup>1</sup>, and Annemarie H. Meijer<sup>1\*</sup>

4

5       <sup>1</sup>Institute of Biology Leiden, Leiden University, Einsteinweg 55, 2333 CC, Leiden, The Netherlands

6

7       \*Author for correspondence: [a.h.meijer@biology.leidenuniv.nl](mailto:a.h.meijer@biology.leidenuniv.nl); +31-71-5274927

8

9       **Short title: Optineurin and p62 function in autophagic defense against tuberculosis**

## 10 **Abstract**

11 Mycobacterial pathogens are the causative agents of chronic infectious diseases like tuberculosis  
12 and leprosy. Autophagy has recently emerged as an innate mechanism for defense against these  
13 intracellular pathogens. *In vitro* studies have shown that mycobacteria escaping from  
14 phagosomes into the cytosol are ubiquitinated and targeted by selective autophagy receptors.  
15 However, there is currently no *in vivo* evidence for the role of selective autophagy receptors in  
16 defense against mycobacteria, and the importance of autophagy in control of mycobacterial  
17 diseases remains controversial. Here we have used *Mycobacterium marinum* (Mm), which causes  
18 a tuberculosis-like disease in zebrafish, to investigate the function of two selective autophagy  
19 receptors, Optineurin (Optn) and SQSTM1 (p62), in host defense against a mycobacterial  
20 pathogen. To visualize the autophagy response to Mm *in vivo*, *optn* and *p62* zebrafish mutant  
21 lines were generated in the background of a GFP-Lc3 autophagy reporter line. We found that loss-  
22 of-function mutation of *optn* or *p62* reduces autophagic targeting of Mm, and increases  
23 susceptibility of the zebrafish host to Mm infection. Transient knockdown studies confirmed the  
24 requirement of both selective autophagy receptors for host resistance against Mm infection. For  
25 gain-of-function analysis, we overexpressed *optn* or *p62* by mRNA injection and found this to  
26 increase the levels of GFP-Lc3 puncta in association with Mm and to reduce the Mm infection  
27 burden. Taken together, our results demonstrate that both Optineurin and p62 are required for  
28 autophagic host defense against mycobacterial infection and support that protection against  
29 tuberculosis disease may be achieved by therapeutic strategies that enhance selective autophagy.

30

## 31 **Author summary**

32 Tuberculosis is a serious infectious disease that claims over a million lives annually. Vaccination  
33 provides insufficient protection and the causative bacterial pathogen, *Mycobacterium*  
34 *tuberculosis*, is becoming increasingly resistant to antibiotic therapy. Therefore, there is an urgent  
35 need for novel therapeutic strategies. Besides searches for new antibiotics, considerable efforts  
36 are being made to identify drugs that improve the immune defenses of the infected host. One  
37 host defense pathway under investigation for therapeutic targeting is autophagy, a cellular  
38 housekeeping mechanism that can direct intracellular bacteria to degradation. However,  
39 evidence for the anti-mycobacterial function of autophagy is largely based on studies in cultured  
40 cells. Therefore, we set out to investigate anti-mycobacterial autophagy using zebrafish embryos,  
41 which develop hallmarks of tuberculosis following infection with *Mycobacterium marinum*. Using  
42 red-fluorescent mycobacteria and a green-fluorescent zebrafish autophagy reporter we could  
43 visualize the anti-mycobacterial autophagy response in a living host. We generated mutant and  
44 knockdown zebrafish for two selective autophagy receptors, Optineurin and p62, and found that  
45 these have reduced anti-bacterial autophagy and are more susceptible to tuberculosis. Moreover,  
46 we found that increased expression of these receptors enhances anti-bacterial autophagy and  
47 protects against tuberculosis. These results provide new evidence for the host-protective function  
48 of selective autophagy in tuberculosis.

49

50

51

## 52 Introduction

53 Autophagy is a fundamental cellular pathway in eukaryotes that functions to maintain  
54 homeostasis by degradation of cytoplasmic contents in lysosomes (1). During autophagy, protein  
55 aggregates or defective organelles are sequestered by double-membrane structures, called  
56 isolation membranes or phagophores, which mature into autophagosomes capable of fusing with  
57 lysosomes. Autophagy was previously considered a strictly non-selective bulk degradation  
58 pathway. However, recent comprehensive studies have highlighted its selective ability. Selective  
59 autophagy depends on receptors that interact simultaneously with the cytoplasmic material and  
60 with the autophagosome marker microtubule-associated protein 1 light chain 3 (Lc3), thereby  
61 physically linking the cargo with the autophagy compartment (2, 3). Different selective autophagy  
62 pathways are classified according to their specific cargo; for example, mitophagy is the pathway  
63 that degrades mitochondria, aggrephagy targets misfolded proteins or damaged organelles, and  
64 xenophagy is directed against intracellular microorganisms. Recent studies have firmly  
65 established xenophagy as an effector arm of the innate immune system (4-6). The xenophagy  
66 pathway targets microbial invaders upon their escape from phagosomes into the cytosol, where  
67 they are coated by ubiquitin. These ubiquitinated microbes are then recognized by selective  
68 autophagy receptors of the Sequestosome (p62/SQSTM1)-like receptor (SLR) family, including  
69 p62, Optineurin, NDP52, NBRC1, and TAX1BP1 (5). In addition to targeting microbes to autophagy,  
70 SLRs also deliver ubiquitinated proteins to the same compartments. It has been shown that the  
71 processing of these proteins into neo-antimicrobial peptides is important for elimination of the  
72 pathogen *Mycobacterium tuberculosis* in macrophages (7).

73 *M. tuberculosis* (Mtb) is the causative agent of chronic and acute tuberculosis (Tb) infections that  
74 remain a formidable threat to global health, since approximately one-third of the human  
75 population carry latent infections and 9 million new cases of active disease manifest annually.  
76 Current therapeutic interventions are complicated by increased incidence of multi-antibiotic  
77 resistance of Mtb and co-infections with Human Immunodeficiency Virus (HIV). Despite decades  
78 of extensive research efforts, the mechanisms of how Mtb subverts the host's innate immune  
79 defenses are incompletely understood, which poses a bottleneck for developing novel  
80 therapeutic strategies (8). Because of the discovery of autophagy as an innate host defense  
81 mechanism, the potential of autophagy-inducing drugs as adjunctive therapy for Tb is now being  
82 explored (9).

83 Many studies have shown that induction of autophagy in macrophages by starvation, interferon- $\gamma$   
84 (IFN- $\gamma$ ) treatment, or by autophagy-inducing drugs, promotes maturation of mycobacteria-  
85 containing phagosomes and increases lysosome-mediated bacterial killing (7, 10-12).  
86 Furthermore, it has been shown that the ubiquitin ligase Parkin and the ubiquitin-recognizing  
87 SLRs p62 and NDP52 are activated by the escape of Mtb from phagosomes into the cytosol (13,  
88 14). Subsequently, the ubiquitin-mediated xenophagy pathway targets Mtb to autophagosomes  
89 (13, 14). Parkin-deficient mice are extremely vulnerable to Mtb infection (14). However, a recent  
90 study has questioned the function of autophagy in the host immune response against Mtb, since  
91 mutations in several autophagy proteins, with the exception of ATG5, did not affect the  
92 susceptibility of mice to acute Mtb infection (15). The susceptibility of ATG5-deficient mice in this  
93 study was attributed to the ability of ATG5 to prevent a neutrophil-mediated immunopathological  
94 response rather than to direct autophagic elimination of Mtb. In the same study, loss of p62 did

95 not affect the susceptibility of mice to Tb, despite that p62 has previously been shown to be  
96 required for autophagic control of Mtb in macrophages (7, 15). These different reports suggest  
97 that Mtb employs virulence mechanisms to suppress autophagic defense mechanisms and that  
98 the host requires autophagy induction as a countermeasure (12). Taken together, the role that  
99 autophagy plays in Tb is complex and further studies are required to determine if pharmacological  
100 intervention in this process is useful for a more effective control of this disease.

101 In this study, we utilized zebrafish embryos and larvae to investigate the role of selective  
102 autophagy during the early stages of mycobacterial infection, prior to the activation of adaptive  
103 immunity. Zebrafish is a well-established animal model for Tb that has generated important  
104 insights into host and bacterial factors determining the disease outcome (16, 17). Infection of  
105 zebrafish embryos with *Mycobacterium marinum* (Mm), a pathogen that shares the majority of  
106 its virulence factors with Mtb, results in the formation of granulomatous aggregates of infected  
107 macrophages, considered as a pathological hallmark of Tb (17-19). Using a combination of  
108 confocal imaging in GFP-Lc3 transgenic zebrafish and transmission electron microscopy, we have  
109 previously shown that the autophagy machinery is activated during the early stages of granuloma  
110 formation in this model (20, 21). Furthermore, we found that the DNA-damage regulated  
111 autophagy modulator Dram1 protects the zebrafish host against Mm infection by a p62-  
112 dependent mechanism (21). However, the role of p62 and other SLRs in host defense against Mm  
113 remains to be further elucidated.

114 p62 is known to function cooperatively with Optineurin in xenophagy of *Salmonella enterica* (22-  
115 24). Both these SLRs are phosphorylated by Tank-binding kinase 1 (TBK1) and bind to different

116 microdomains of ubiquitinated bacteria as well as interacting with Lc3 (23, 25). While several  
117 studies have implicated p62 in autophagic defense against Mtb, Optineurin has thus far not been  
118 linked to control of mycobacterial infection (7, 13, 24-26). We found gene expression of *p62* and  
119 *optn* to be coordinately upregulated during granuloma formation in zebrafish larvae (27), and set  
120 out to study the function of these SLRs by CRISPR/Cas9-mediated mutagenesis. We found that  
121 either p62 or Optineurin deficiency increased the susceptibility of zebrafish embryos to Mm  
122 infection, while overexpression of *p62* or *optn* mRNAs enhanced Lc3 association with Mm and  
123 had a host-protective effect. These results provide new *in vivo* evidence for the role of selective  
124 autophagy as an innate host defense mechanism against mycobacterial infection.

125

## 126 **Results**

### 127 ***Mycobacterium marinum* bacteria are ubiquitinated during infection of zebrafish**

128 Phagosomal permeabilization and cytosolic escape of Mtb is known to induce the STING-  
129 dependent DNA-sensing pathway, resulting in ubiquitination and targeting of bacteria to  
130 autophagy (13). We have previously shown that this pathway is also functional in zebrafish larvae  
131 infected with Mm and that a failure to induce autophagy reduces host resistance (21). However,  
132 it had not been formally demonstrated that Mm bacteria are ubiquitinated in this model. To  
133 examine whether ubiquitin interacts with Mm and Lc3 during infection of zebrafish, we infected  
134 embryos at 28 hours post fertilization (hpf) and performed immunostaining for ubiquitin at 1, 2,  
135 and 3 days post- infection (dpi), time points at which the early stages of tuberculous granuloma  
136 formation can be observed (Fig1 A). This process of granuloma formation is known to be induced  
137 by infected macrophages, which attract new macrophages that subsequently also become  
138 infected (28). Developing granulomas also attract neutrophils and usually contain extracellular  
139 bacteria released by dying cells (29). We observed that around 3% and 9% of Mm clusters are  
140 targeted by GFP-Lc3 at 1 and 2 dpi, respectively, which increases to uncountable levels at 3 dpi  
141 because of the increasing numbers and size of granulomas (Fig1 B and Fig1 C). These results were  
142 confirmed by Western blot, showing that LC3-II protein levels – indicative of autophagosome  
143 formation – gradually increased during Mm infection compared to uninfected controls (Fig1 D).  
144 Using a FK2 ubiquitin antibody, which can recognize monoubiquitinated cell surface molecules as  
145 well as polyubiquitin chains, we observed that ubiquitin co-localized with approximately 4%  
146 and 10% of the Mm clusters at 1 and 2 dpi, respectively (Fig1 E and Fig1 F). Furthermore, we



147 observed by Western blot detection that Mm infection increased general levels of protein  
148 ubiquitination (Fig1 G). In addition, we found that ubiquitin and GFP-Lc3 co-localized at Mm  
149 clusters (Fig1 H). Collectively, these data demonstrate that Mm is marked by ubiquitin and that  
150 overall ubiquitination levels are induced during infection in the zebrafish model, which coincides  
151 with autophagic targeting of bacteria.

152

### 153 **Deficiency in the ubiquitin receptors Optineurin or p62 does not impair zebrafish development**

154 Since ubiquitinated bacteria are targets for members of the sequestosome-like receptor family,  
155 we compared the protein sequences of its members p62, Optineurin, Calcoco2 (Ndp52), Nbr1,  
156 and Tax1bp1 between human, zebrafish and other vertebrates, showing a high overall degree of  
157 conservation (S1B Fig and S1C Fig). We focused this study on two members of the family, *p62* and  
158 *optn*, which are transcriptionally induced during Mm infection of zebrafish based on published  
159 RNA sequencing data (27) and show strong similarity with their human orthologues in the  
160 ubiquitin-binding domains (UBA in p62 and UBAN in Optineurin) and Lc3 interaction regions (LIR)  
161 (S1D Fig). With the aim to investigate the functions of Optineurin and p62 in anti-mycobacterial  
162 autophagy, we utilized CRISPR/Cas9 genome editing technology to generate mutant zebrafish  
163 lines. We designed short guide RNAs for target sites at the beginning of coding exons 2 of the  
164 *optn* and *p62* genes, upstream of the exons encoding the ubiquitin and Lc3 binding regions, such  
165 that the predicted effect of CRISPR mutation is a complete loss of protein function (Fig2 A). A  
166 mixture of sgRNA and Cas9 mRNA was injected into zebrafish embryos at the one cell stage and  
167 founders carrying the desired mutations were outcrossed to the *Tg(CMV:EGFP-map1lc3b)*

168 autophagy reporter line (hereafter referred to as GFP-Lc3) (Fig2 B)(30). The established *optn*  
169 mutant allele carried a 5 nucleotides deletion at the target site, which we named *optn*<sup>Δ5n/Δ5n</sup> (Fig2  
170 C). The *p62* mutant allele carried an indel resulting in the net loss of 37 nucleotides, which we  
171 named *p62*<sup>Δ37n/Δ37n</sup> (Fig2 C). The homozygous mutants were fertile and produced embryos that  
172 did not exhibit detectable morphological differences compared with embryos produced by their  
173 wild-type (*optn*<sup>+/+</sup> or *p62*<sup>+/+</sup>) siblings (S1A Fig). Furthermore, no significant deviation from the  
174 Mendelian 1:2:1 ratio for +/+, +/- and -/- genotypes was observed when the offspring of  
175 heterozygous incrosses were sequenced at 3 months of age (Fig2 E). Western blot analysis using  
176 anti-Optineurin and anti-p62 C-terminal antibodies confirmed the absence of the proteins in the  
177 respective mutant lines (Fig2 D). In addition, quantitative PCR (Q-PCR) analysis revealed  
178 approximately 4.5-fold reduction of *optn* mRNA in the *optn*<sup>Δ5n/Δ5n</sup> larvae and 10-fold reduction of  
179 *p62* mRNA in the *p62*<sup>Δ37n/Δ37n</sup> larvae, indicative of nonsense-mediated mRNA decay (Fig2 F).  
180 Collectively, the *optn*<sup>Δ5n/Δ5n</sup> and *p62*<sup>Δ37n/Δ37n</sup> mutant zebrafish produce no functional Optineurin  
181 or p62, respectively, and the loss of these ubiquitin receptors does not induce detectable  
182 developmental defects that could interfere with the use of the mutant lines in infection models.

183

#### 184 **Optineurin or p62 deficiencies affect autophagy**

185 To analyze the effects of Optineurin or p62 deficiency on autophagy, we performed Lc3 Western  
186 blot detection on whole embryo extracts and imaged GFP-Lc3 signal *in vivo* (Fig3 A). Differences  
187 in the levels of the cytosolic (Lc3-I) and membrane-bound (Lc3-II) forms of Lc3 or effects on GFP-  
188 Lc3 puncta accumulation can be due to altered basal autophagy levels, but can also be caused by  
189 differences in autophagosome degradation. Therefore, we also examined Lc3-I/Lc3-II levels and

190 GFP-Lc3 accumulation in larvae following treatment with Bafilomycin A1 (Baf A1), which is an  
191 inhibitor of vacuolar H<sup>+</sup> ATPase (V-ATPase) that prevents maturation of autophagic vacuoles by  
192 inhibiting fusion between autophagosomes and lysosomes (31, 32). First, we performed a dose  
193 range assay to determine the effect of Baf A1 on Lc3-II accumulation in zebrafish embryos. Results  
194 showed that after 12 h of incubation, a dosage of 100nM resulted in Lc3-II accumulation without  
195 affecting the Lc3-I level, whereas higher dosage additionally increased the Lc3-I level (S2A Fig).  
196 Thus, we utilized a dosage of 100nM to test Lc3-II accumulation in wildtype and mutant embryos  
197 not carrying the GFP-Lc3 reporter (Fig3 B). No differences in Lc3-II accumulation were observed  
198 between *optn*<sup>+/+</sup> and *optn*<sup>Δ5n/Δ5n</sup> embryos or between *p62*<sup>+/+</sup> and *p62*<sup>Δ37n/Δ37n</sup> embryos (Fig3 C).  
199 However, accumulation of Lc3-II in *optn* or *p62* mutant embryos was significantly reduced in  
200 presence of Baf A1 (52% and 66%, respectively) compared to the wildtype controls (Fig3 C). In  
201 agreement, the number of GFP-Lc3 puncta in *optn* or *p62* mutants were significantly lower than  
202 in the corresponding WT controls, showing 59% and 47% reductions, respectively (Fig3 D and Fig3  
203 E).

204 The function of Optineurin and p62 as ubiquitin receptors implies that these proteins are  
205 degraded themselves during the process of autophagy. Therefore, we asked if p62 protein levels  
206 are affected in *optn* mutants or, vice versa, if *p62* mutation impacts Optineurin protein levels.  
207 Western blot analysis showed accumulation of p62 and Optineurin protein in wild type embryos  
208 in response to Baf A1 treatment, confirming that these ubiquitin receptors are substrates for  
209 autophagy under basal conditions (S2B Fig). Levels of p62 protein were reduced in *optn*<sup>Δ5n/Δ5n</sup>  
210 embryos compared with *optn*<sup>+/+</sup>, both in absence or presence of Baf A1 (Fig3 F). This difference  
211 was not due to a transcriptional effect, since p62 mRNA levels were not significantly different

212 between *optn*<sup>+/+</sup> and *optn*<sup>Δ5n/Δ5n</sup> embryos (Fig2 F). Similarly, levels of Optineurin protein were  
213 reduced in *p62*<sup>Δ37n/Δ37n</sup> embryos compared with *p62*<sup>+/+</sup> in absence or presence of Baf A1 (Fig3 F),  
214 and again this was not associated with a difference in mRNA expression (Fig2 F). In conclusion,  
215 the absence of either of the ubiquitin receptors, Optineurin or p62, leads to increased use of the  
216 other ubiquitin receptor as a substrate for autophagic degradation. Furthermore, loss of either of  
217 the receptors leads to lower levels of Lc3-II and GFP-Lc3 accumulation when lysosomal  
218 degradation is blocked, suggesting reduced activity of the autophagy pathway in the *optn* and  
219 *p62* mutants.

220

## 221 **Optineurin or p62 deficiencies increase the susceptibility of zebrafish embryos to Mm infection**

222 Next, we asked if *optn* or *p62* mutations would affect the resistance of zebrafish embryos to  
223 mycobacterial infection. We injected Mm into embryos via the caudal vein at 28 hpf to measure  
224 infection burden at 3 dpi (Fig4 A). The infection data showed that *optn* or *p62* mutant embryos  
225 were hypersusceptible to Mm infection compared with their WT controls, culminating in an  
226 increase of the Mm fluorescent signal of 2.8 and 2.9 times, respectively (Fig4 B). In addition, we  
227 examined whether transient knockdown of *optn* or *p62* would phenocopy the infection  
228 phenotype of the mutant lines. We injected *optn* or *p62* antisense morpholino oligonucleotides  
229 into the one cell stage of embryos and collected injected individuals at 28h for confirmation of  
230 the knockdown effect by reverse transcription polymerase chain reaction (RT-PCR) and Western  
231 blot (S3A Fig , S3B Fig and S3C Fig). Subsequently, analysis of the Mm infection burden at 3 dpi  
232 showed that transient knockdown of *optn* or *p62* led to similar increases of the Mm infection

233 burden as had been observed in the mutant lines (Fig4 C). Since Optineurin and p62 are known  
234 to function cooperatively in xenophagy of *Salmonella enterica* (22-24), we asked if double  
235 deficiency of Optineurin and p62 resulted in an increased infection burden compared to single  
236 mutation of either *optn* or *p62*. No additive effect on the infection burden was observed when  
237 *p62* morpholino was injected into *optn* mutant embryos or *optn* morpholino into *p62* mutant  
238 embryos (Fig4 D). Taken together, our data demonstrate that both Optineurin and p62 are  
239 required for controlling Mm infection and that loss of either of these ubiquitin receptors cannot  
240 be compensated for by the other receptor in this context.

241

#### 242 **Optineurin or p62 deficiency reduces the autophagy response to Mm infection**

243 Having established that mutation of either *optn* or *p62* results in increased Mm infection burden,  
244 we investigated if the inability of mutant embryos to control infection is due to a reduction in the  
245 targeting of mycobacteria to autophagy (Fig5 A). To this end, we first examined the association of  
246 GFP-Lc3 with Mm at 1 dpi. Mm has formed small infection foci at this time point, which could be  
247 manually scored as positive or negative for GFP-Lc3 association. In wild type embryos 5-6% of  
248 these infection foci were positive for GFP-Lc3 (S4A Fig and S4B Fig). The percentage of GFP-Lc3  
249 positive Mm clusters was approximately 50% lower in the *optn* or *p62* mutant embryos compared  
250 with their wild type controls, but differences were not statistically significant due to the relatively  
251 low number of these GFP-Lc3 association events (S4A Fig and S4B Fig). We continued to examine  
252 GFP-Lc3 targeting to Mm at 2 dpi and found that mutation of *optn* or *p62* resulted in significantly  
253 decreased GFP-Lc3 co-localization with Mm clusters (Fig5 A, B and C). In addition, we used GFP-

254 Lc3-negative mutant and wild type larvae for Western blot analysis of Lc3-II protein levels in  
255 response to infection. We found that Mm infection increased Lc3-II protein levels approximately  
256 3- to 5-fold in wild type (*optn*<sup>+/+</sup> and *p62*<sup>+/+</sup>) larvae at 3 dpi, whereas this induction level was  
257 approximately 50% lower in the *optn* and *p62* mutant larvae (Fig5 D). Mm-infected mutant  
258 embryos also showed reduced Lc3-II accumulation in the presence of Baf A1 (S4B Fig). Taken  
259 together, these data support the hypothesis that Optineurin and p62 are required for autophagic  
260 defense against mycobacterial infection.

261

#### 262 **Overexpression of *optn* or *p62* increases resistance of zebrafish embryos to Mm infection**

263 To further test the hypothesis that Optineurin and p62 mediate autophagic defense against Mm,  
264 we generated full-length *optn* and *p62* mRNAs *in vitro* and injected these into embryos at the one  
265 cell stage, resulting in ubiquitous overexpression (Fig6 A). The increase in Optineurin or p62  
266 protein levels following mRNA injection was verified by Western blot analysis (Fig6 B) and no  
267 effects of overexpression on embryo survival or development were observed (data not shown).  
268 Overexpression of *optn* or *p62* mRNAs significantly reduced Mm infection burden at 2 or 3 dpi  
269 compared to the control groups (Fig6 C and S5A Fig). Furthermore, injection of *optn* or *p62* mRNAs  
270 carrying deletions in the sequences encoding the ubiquitin binding domains or Lc3 interaction  
271 regions did not lead to a reduction of the Mm infection burden compared with the control groups  
272 (Fig6 C). Thus, we conclude that *optn* or *p62* overexpression protects against Mm infection in a  
273 manner dependent on the interaction of the Optn and p62 proteins with both ubiquitin and Lc3.

274

## 275 **Overexpression of *optn* or *p62* promotes GFP-Lc3 association with Mm**

276 Since overexpression of *optn* or *p62* mRNAs resulted in decreased Mm infection burden, we  
277 postulated that elevation of the Optn or p62 protein levels would result in increased targeting of  
278 Mm to autophagy by these ubiquitin receptors, in a manner dependent on the functions of the  
279 Lc3 interaction (LIR) and ubiquitin binding domains (UBAN/UBA). To test this hypothesis, we  
280 injected the full-length mRNAs, or mRNAs generated from deletion constructs lacking these  
281 domains, and quantified GFP-Lc3-positive and GFP-negative Mm infection foci at 1 dpi and 2 dpi  
282 (S6A Fig and Fig7 A). The results showed that overexpression of full-length *optn* or *p62* mRNAs  
283 significantly increased the percentage of GFP-Lc3-positive Mm clusters at 2 dpi, compared with  
284 the control groups (Fig7 B and Fig7 C). Conversely, injection of *optn*  $\Delta$ UBAN, *optn*  $\Delta$ LIR, *p62*  $\Delta$ UBA  
285 and *p62*  $\Delta$ LIR mRNAs did not increase the association of GFP-Lc3 with Mm clusters (Fig7 B and  
286 Fig7 C). Similar results could be observed as early as 1 day post infection (S6B Fig). In conclusion,  
287 our combined results demonstrate that Optineurin and p62 can target Lc3 to Mm and that  
288 increasing the level of either of these receptors promotes host defense against this mycobacterial  
289 pathogen.

290

## 291 **Discussion**

292 Members of the family of sequestosome (p62/SQSTM1)-like receptors (SLRs) function in  
293 autophagic host defense mechanisms targeting a range of intracellular pathogens, including  
294 *Salmonella*, *Shigella*, *Streptococci*, *Listeria*, *Mycobacteria*, and Sindbis virus (5, 13, 14, 33). These  
295 discoveries inspired investigations into autophagy modulators as host-directed therapeutics for

296 treatment of infectious diseases, including Tb (9, 34, 35). However, the relevance of autophagic  
297 defense mechanisms for host resistance against Mtb infection has recently been questioned (15,  
298 36). This indicates that there are significant gaps in our understanding of the interaction between  
299 components of the autophagy pathway and mycobacterial pathogens, emphasizing the need for  
300 more research in animal models of Tb (12). Here, we have studied the function of two SLR family  
301 members in the zebrafish Tb model. We show that selective autophagy mediated by p62 and  
302 Optineurin provides resistance against mycobacterial infection in the context of our *in vivo*  
303 infection model that is representative of the early stages of Tb granuloma formation (17, 19). Our  
304 findings support the host-protective role of p62 in Tb by autophagic targeting of *Mycobacteria*, in  
305 line with previous *in vitro* studies (13, 14). Importantly, we also present the first evidence linking  
306 Optineurin to resistance against *Mycobacteria*, expanding our understanding of the function of  
307 SLRs in host defense against intracellular pathogens.

308 The zebrafish embryo and larval Tb model provides the opportunity to image critical stages of the  
309 mycobacterial infection process, from the initial phagocytosis of Mm by macrophages up to the  
310 early stages of Tb granuloma formation (37). The model is representative of miliary Tb, where the  
311 infection is disseminated to multiple organs of the host. The embryonic and larval stages of the  
312 zebrafish allow us to study the contribution of innate immunity to host defense, since they lack a  
313 matured adaptive immune response at this time point of development (17). We therefore used  
314 this model to study the importance of autophagic defense mechanisms during innate host  
315 defense against mycobacterial infections. In this study, we successfully generated *p62* and *optn*  
316 loss-of-function zebrafish mutant lines using CRISPR/Cas9 technology. Besides its role in host  
317 defense, p62 is a stress-inducible protein that functions as a signalling hub in diverse processes



318 like amino acid sensing and the oxidative stress response (38). Defects in autophagy pathways  
319 caused by mutations in *OPTN* have been associated with human disorders like glaucoma, Paget  
320 disease of bone, and amyotrophic lateral sclerosis (24, 39). Despite the important functions  
321 reported for p62 and Optineurin in cellular homeostasis, the mutant fish lines we generated are  
322 viable and fertile. The absence of either p62 or Optineurin resulted in increased use of the other  
323 ubiquitin receptor to sequester autophagic cargo in zebrafish larvae. Nonetheless, loss of either  
324 of the receptors leads to lower levels of Lc3-II and GFP-Lc3 accumulation when lysosomal  
325 degradation is blocked, which indicates reduced activity of the autophagy pathway in these  
326 mutants. Therefore, we could use these mutant lines to gain a better understanding of the role  
327 of p62, Optineurin, and selective autophagy in host defense against mycobacterial infection.

328 Genetic links between autophagy pathway genes and susceptibility to Tb in human populations  
329 support the function of autophagy in innate host defense against Mtb (40). However, the  
330 contribution of autophagy as a direct anti-mycobacterial mechanism has recently been  
331 challenged, since macrophage-specific depletion of a number of autophagy genes, including *p62*,  
332 did not affect the outcome of disease in a mouse model of Tb (15, 36). A possible explanation for  
333 these findings, as suggested by the authors of this study, is that Mtb, like other successful  
334 intracellular pathogens, could have evolved virulence mechanisms that subvert or exploit  
335 autophagic defense mechanisms employed by the host (41). In case of one of the autophagy  
336 genes, *ATG5*, macrophage-specific depletion increased Mtb infection in mice by over-activating  
337 inflammation rather than by impairing autophagic processes (15). It is therefore conceivable that  
338 modulating the activity of SLRs could also affect inflammation. Indeed, Optineurin has been  
339 implicated in inflammatory bowel disease and both p62 and Optineurin are involved in regulation

340 of inflammatory signaling downstream of NF- $\kappa$ B (42-46). Through a process that involves  
341 polyubiquitination of regulatory proteins, both p62 and Optineurin can modulate the activity of  
342 the IKK kinase complex that activates NF $\kappa$ B (42, 43). It is therefore possible that altered  
343 inflammatory responses in *p62* and *optn* mutants could explain (part of) the increase in  
344 mycobacterial burden observed in zebrafish hosts, while the beneficial role for autophagic  
345 defense mechanisms targeting the bacteria might be limited.

346 To investigate the possible role of Optineurin and p62 in anti-mycobacterial autophagy, we  
347 quantified the association between GFP-Lc3 and Mm under loss-of-function and gain-of-function  
348 conditions of both receptors. In wild type zebrafish embryos, only 3-5% of the bacteria co-  
349 localized with autophagic vesicles one day after a systemic infection with mycobacteria. Although  
350 the number of GFP-Lc3 positive bacterial clusters rises over the next two days, the percentage of  
351 bacteria targeted by autophagy at any distinct time point remains relatively low (e.g. ~10% at 2  
352 days post infection). According to these results, the host only employs autophagic defense  
353 mechanisms against a small proportion of the invading mycobacteria during early stages of the  
354 infection, either because there is no greater need, or because the pathogens are indeed  
355 effectively suppressing this response. It is important to note though that GFP-Lc3 association with  
356 Mm is a transient process (20), which means that the percentage of bacteria that encounter  
357 autophagic defenses throughout the early infection process might be much higher. Strikingly, the  
358 percentage of bacteria labeled by ubiquitin closely resembled the percentage of bacteria targeted  
359 by autophagy, and we were able to detect clear colocalization between ubiquitin and GFP-Lc3 at  
360 bacterial clusters. Upon loss-of-function of either p62 or Optineurin, the co-localization between  
361 bacteria and autophagic vesicles decreased and the bacterial burden increased. Conversely,

362 overexpression of either ubiquitin binding receptor increased autophagic targeting of bacteria  
363 and resulted in lower bacterial burdens, both of which required the presence of functional Lc3  
364 and ubiquitin binding domains. Taken together, we conclude that autophagic targeting of  
365 mycobacteria by p62 and Optineurin indeed provides protection against infection in our *in vivo*  
366 Tb model.

367 In summary, our findings confirm that p62 mediates ubiquitin-dependent autophagic targeting of  
368 mycobacteria in an *in vivo* model for Tb. We also provide the first evidence that the SLR family  
369 member Optineurin is involved in autophagic targeting of ubiquitinated mycobacteria. While we  
370 cannot exclude a role for p62 and Optineurin in regulating inflammatory processes during Tb  
371 disease progression, we have shown that the autophagic targeting of mycobacteria by these  
372 ubiquitin-binding receptors forms an important aspect of innate host defense against Tb. Our  
373 results are therefore especially important for the development of new treatment strategies for  
374 Tb patients with a compromised adaptive immune system – such as in HIV-coinfection. Based on  
375 these results, selective autophagy stimulation remains a promising strategy for development of  
376 novel anti-Tb therapeutics.

## 377 **Materials and methods**

### 378 **Ethics statement**

379 Zebrafish lines in this study (S1 Table) were handled in compliance with local animal welfare  
380 regulations as overseen by the Animal Welfare Body of Leiden University (License number: 10612)  
381 and maintained according to standard protocols (zfin.org). All protocols adhered to the  
382 international guidelines specified by the EU Animal Protection Directive 2010/63/EU. The  
383 generation of zebrafish *optn* and *p62* mutant lines was approved by the Animal Experimentation  
384 Committee of Leiden University (UDEC) under protocol 14198. All experiments with these  
385 zebrafish lines were done on embryos or larvae up to 5 days post fertilization, which have not yet  
386 reached the free-feeding stage. Embryos were grown at 28.5°C and kept under anesthesia with  
387 egg water containing 0.02% buffered 3-aminobenzoic acid ethyl ester (Tricaine, Sigma) during  
388 bacterial injections, imaging and fixation.

389

### 390 **CRISPR/Cas9 mediated mutagenesis of zebrafish *optn* and *p62***

391 Single guide RNAs (sgRNAs) targeting the second coding exon of zebrafish *optn*  
392 (ENSDART00000014036.10) and the third coding exon of *p62* (ENSDART000000140061.2) were  
393 designed using the chop-chop website (47). To make sgRNAs, the template single strand DNA  
394 (ssDNA) (122 bases) was obtained by PCR complementation and amplification of full length ssDNA  
395 oligonucleotides. Oligonucleotides up to 81 nucleotides were purchased from Sigma-Aldrich using  
396 standard synthesis procedures (25 nmol concentration, purification with desalting method) (S2

397 Table and S3 Table). The pairs of semi-complimentary oligos were annealed together by a short  
398 PCR program (50  $\mu$ L reaction, 200uM dTNPs, 1 unit of Dream Taq polymerase (EP0703,  
399 ThermoFisher); PCR program: initial denaturation 95°C/3 minute (min), 5 amplification cycles  
400 95°C/30 Second (s), 55°C/60 s, 72°C/30 s, final extension step 72°C/15 min) and subsequently the  
401 products were amplified using the primers in S2 Table with a standard PCR program (initial  
402 denaturation 95°C/3 min, 35 amplification cycles 95°C/30 s,55°C/60 s, 72°C/30 s, final extension  
403 step 72°C/15 min). The final PCR products were purified with Quick gel extraction and PCR  
404 purification combo kit (00505495, ThermoFisher). The purified PCR products were confirmed by  
405 gel electrophoresis and Sanger sequencing (Base Clear, Netherlands). For *in vitro* transcription of  
406 sgRNAs, 0.2  $\mu$ g template DNA was used to generate sgRNAs using the MEGA short script <sup>®</sup>T7 kit  
407 (AM1354, ThermoFisher) and purified by RNeasy Mini Elute Clean up kit (74204, QIAGEN Benelux  
408 B.V., Venlo, Netherlands). The Cas9 mRNA was transcribed using mMACHINE<sup>®</sup> SP6 Transcription  
409 Kit (AM1340, Thermo Fisher) from a Cas9 plasmid (39312, Addgene) (Hrucha et al 2013) and  
410 purified with RNeasy Mini Elute Clean up kit (74204,QIAGEN Benelux B.V., Venlo, Netherlands). A  
411 mixture of sgRNA and Cas9 mRNA was injected into one cell stage AB/TL embryos (sgRNA 150  
412 pg/embryo and Cas9 mRNA 300 pg/embryo). The effect of CRISPR injection was confirmed by PCR  
413 and Sanger sequencing.

414

#### 415 **Genomic DNA isolation and genotyping**

416 Genomic DNA was isolated from an individual embryo (2 dpf) or small pieces of the tail fin tissue  
417 of adults (>3 months) by fin clipping. Embryos or tissue samples were incubated in 200  $\mu$ L 100%

418 Methanol at -20°C overnight (O/N), then methanol was removed, and remaining methanol was  
419 evaporated at 70°C for 20 min. Next, samples were incubated in 25 µL of TE buffer containing 1.7  
420 µg/µL proteinase K at 55°C for more than 5 h. Proteinase K was heat inactivated at 80°C for 30  
421 min, after which samples were diluted with 100 µL of Milli-Q water. Genotyping was performed  
422 by PCR-amplification of the region of interest using the primers in S5 Table followed by Sanger  
423 sequencing to identify mutations (Base Clear, Netherlands).

424

#### 425 **Western blot analysis**

426 Embryos (28hpf/2dpf/4dpf/3dpi) were anaesthetised with Tricaine (Lot#MKBG4400V, SIGMA-  
427 ALDRICH) and homogenised with a Bullet-blender (Next-Advance) in RIPA buffer (#9806, Cell  
428 Signalling) containing a protein inhibitor cocktail (000000011836153001, cOmplete, Roche). The  
429 extracts were then spun down at 4°C for 10 min at 12000 rpm/min and the supernatants were  
430 frozen for storage at -80°C. Western blot was performed using Mini-PROTEAN-TGX (456-9036,  
431 Bio-Rad) or 18% Tris—Hcl 18% polyacrylamide gels, and protein transfer to commercial PVDF  
432 membranes (Trans-Blot Turbo-Transfer pack, 1704156, Bio-Rad). Membranes were blocked with  
433 5% dry milk (ELK, Campina) in Tris buffered saline (TBS) solution with Tween 20 (TBST, 1XTBS  
434 contains 0.1% Tween 20) buffer and incubated with primary and secondary antibodies. Digital  
435 images were acquired using Bio-Rad Universal Hood II imaging system (720BR/01565 UAS). Band  
436 intensities were quantified by densitometric analysis using Image Lab Software (Bio-Rad, USA)  
437 and values were normalised to actin as a loading control. Antibodies used were as follows:  
438 polyclonal rabbit anti-Optineurin (C-terminal) (1:200, lot#100000; Cayman Chemical), polyclonal

439 rabbit anti-p62 (C-terminal) (PM045, lot#019, MBL), polyclonal rabbit anti Lc3 (1:1000, NB100-  
440 2331, lot#AB-3, Novus Biologicals), Anti mono-and polyubiquitinated conjugates mouse  
441 monoclonal antibody (1:200; BML-PW8810-0100, lot#01031445, Enzo life Sciences), Polyclonal  
442 actin antibody (1:1000, 4968S, lot#3, Cell Signaling), Anti-rabbit IgG, HRP-Linked Antibody (1:1000,  
443 7074S, Lot#0026, Cell Signaling), Anti-mouse IgG, HRP-linked Antibody (1:3000, 7076S, Lot#029,  
444 Cell Signaling).

445

#### 446 **Morpholino design and validation**

447 *optn* and *p62* splice blocking morpholinos were purchased from Gene Tools. For morpholino  
448 sequences see S4 Table. Morpholinos were diluted in Milli Q water with 0.05% phenol red and 1  
449 nL of 0.1 mM *optn* or 0.5 mM *p62* Morpholino was injected into the one cell stage of embryos as  
450 previously described (21). The knockdown effect was validated by RT-PCR and Western blot.

451

#### 452 **Infection conditions and bacterial burden quantification**

453 *Mycobacterium marinum* strain 20 bacteria, fluorescently labelled with mCherry, were  
454 microinjected into the blood island of embryos at 28 hpf as previously described (48). The  
455 injection dose was 200 CFU for all experiments. Before the injection, embryos were manually  
456 dechorionated around 24hpf. Approximately 5 min before bacterial injections, zebrafish embryos  
457 were brought under anaesthesia with tricaine. Infected embryos were imaged using a Leica

458 MZ16FA stereo fluorescence microscopy with DFC420C camera, total fluorescent bacterial pixels  
459 per infected fish were determined on whole-embryo stereo fluorescent micrographs using  
460 previously described software (49) .

#### 461 **Confocal laser scanning microscopy and image quantification**

462 Fixed or live embryos were mounted with 1.5% low melting agarose (140727, SERVA) and imaged  
463 using a Leica TCS SPE confocal microscope. For quantification of basal autophagy, fixed uninfected  
464 4dpf larvae were imaged by confocal microscopy with a 63x water immersion objective (NA 1.2)  
465 in a pre-defined region of the tail fin to detect GFP-LC3-positive vesicles (Fig3 D and Fig3 E). The  
466 number of GFP-Lc3 vesicles per condition was quantified using Fiji/ImageJ software (Fig3 D and  
467 Fig3 E). For quantification of the autophagic response targeted to Mm clusters (Fig1 B and C, S4A  
468 Fig and B, S6A Fig and B), live or fixed infected embryos were viewed by confocal microscopy with  
469 a 63x water immersion objective (NA 1.2) and the number of Mm clusters that were targeted by  
470 GFP-Lc3 puncta in the tail region were counted manually. The same approach was used to  
471 quantify Ubiquitin targeting to Mm clusters (Fig1 E and F). To quantify the percentage of GFP-Lc3<sup>+</sup>  
472 Mm clusters, we imaged the entire caudal hematopoietic tissue (CHT) region of 2 dpi larvae  
473 (confocal microscopy; 40X water immersion objective with NA 1.0) and stitched multiple images  
474 together to manually count the number of Mm clusters positive for GFP-Lc3 out of the total  
475 number of clusters (Fig5 B and C, Fig7 B and C) .

476

#### 477 **Immunostaining**



478 Embryos (1,2,3 dpi) were fixed with 4% PFA in PBS and incubated overnight with shaking at 4°C.  
479 After washing the embryos three times briefly in PBS with 0.8% Triton-x100) (PBSTx), the  
480 embryos/larvae were digested in 10 µg/ml proteinase K (000000003115879001, SIGMA-ALDRICH)  
481 for 10 minutes at 37°C. Subsequently, the embryos were quickly washed, blocked with PBSTx  
482 containing 1% Bovine serum albumins (BSA) (A4503-100g, SIGMA-ALDRICH) for 2h at room  
483 temperature and incubated overnight at 4°C in mono-and polyubiquitinated conjugates mouse  
484 monoclonal antibody (1:200; BML-PW8810-0100; Enzo lifes Siences), diluted in the blocking  
485 buffer. Next, embryos were washed three times in PBSTx, incubated for 1 h in blocking buffer at  
486 room temperature, incubated for 2 h at room temperature in 1:200 dilution of Alexa Fluor 488 or  
487 633 goat anti-mouse (Invitrogen) in blocking buffer, followed with three times washes in PBSTx  
488 for imaging.

489

#### 490 **mRNA preparation and injection**

491 *optn* (ENSDART00000014036.10, Ensembl) and *p62* (ENSDART00000140061.2, Ensembl) cDNAs  
492 were amplified from 3dpf AB/TL embryos by PCR (primers in S5 Table) and ligated into a vector  
493 using the Zero-blunt cloning PCR kit (450245, Invitrogen). The sequence was confirmed by Sanger  
494 sequencing (BaseClear, Netherlands), after which *optn* and *p62* cDNAs were subcloned into a  
495 pCS2+ expression vector.

496 *optn* ΔUBAN cDNA was produced by in vitro transcription of *optn*-pCS2+ constructs digested by  
497 Sca1(R3122, NEB), which excludes the region encoding the UBAN protein domain.

498 *optn* ΔLIR cDNA was amplified from *optn*-pCS2+ constructs by designed primers (S5 Table),  
499 excluding the LIR protein domain. The PCR products were gel purified by Quick gel Extraction PCR  
500 Purification Combo Kit (K220001, Invitrogen) and the two fragments and pCS2+ plasmid were  
501 digested by BamH1(R0136S, NEB) and EcoR1(R0101S, NEB), after which the two fragments were  
502 ligated into pCS2+ plasmid by T4 DNA ligase.

503 *p62* ΔUBA cDNA was obtained from a *p62*-pCS2+ construct by Nco1(R0193S, NEB) digestion and  
504 religation, which excludes the region encoding the UBA protein domain.

505 *p62* ΔLIR cDNA was obtained from a *p62*-pCS2+ construct by NcoN1 digestion and religation.

506 *Optn* mRNA, *optn* ΔUBAN, and *optn* ΔLIR mRNA was generated using SP6 mMessage mMachine  
507 kit (Life Technologies) from Kpn1 or Sac1(R0156S, NEB) digested *optn*-pCS2+ constructs. RNA  
508 purification was performed using the RNeasy Mini Elute Clean up kit (QIAGEN Benelux B.V., Venlo,  
509 Netherlands).

510 *In vitro* transcription of *p62*, *p62* ΔUBA, and *p62* ΔLIR was performed using mMESSAGING  
511 mMACHINE® T3 Transcription Kit (AM1348, Thermo Fisher) and purified using the RNeasy  
512 MiniElute Cleanup kit (QIAGEN Benelux B.V., Venlo, Netherlands). All mRNAs were injected into  
513 one cell stage embryos, and the overexpression effects of *optn* or *p62* were validated by Q-PCR  
514 and Western blot.

515

## 516 **Gene Expression Analysis**

517 Total RNA was extracted using Trizol reagent (15596026, Invitrogen) according to the  
518 manufacturer's instructions and purified with RNeasy Min Elute Clean up kit (Lot:154015861,  
519 QIAGEN). RNAs were quantified using a NanoDrop 2000c instrument (Thermo Scientific, U.S).  
520 Reverse transcription reaction was performed using 0.5 µg of total RNA with iScript cDNA  
521 synthesis kit (Cat:#170-8891, Bio-Rad). The mRNA expression level was determined by  
522 quantitative real-time PCR using iQSYBR Green Supermix (Cat:170-8882, Rio-Rad) and Single color  
523 Real-Time PCR Detection System (Bio-Rad, U.S) as previously described (50). All primers are listed  
524 in S5 Table.

525

## 526 **Statistical analyses**

527 Statistical analyses were performed using GraphPad Prism software (Version 5.01; GraphPad). All  
528 experimental data (mean ± SEM) was analyzed using unpaired, two-tailed t-tests for comparisons  
529 between two groups and one-way ANOVA with Tukey's multiple comparison methods as a  
530 posthoc test for comparisons between more than two groups. (ns, no significant difference; \*p <  
531 0.05; \*\*p < 0.01; \*\*\*p < 0.001). To determine whether the offspring of F1 heterozygous mutants  
532 follows Mendelian segregation, the obtained data was analysed with a Chi-square test (ns, no  
533 significant difference).



## 535 **Acknowledgements**

536 We thank Daniel Klionsky for sharing of the GFP-Lc3 transgenic zebrafish line. We are grateful to  
537 all members of the fish facility team for zebrafish caretaking. We would like to thank Gerda  
538 Lamers and Joost Willemse for advice on confocal imaging and image analysis.

539

540

541

542

543

544

## 545 **References**

- 546 1. Ohsumi Y. Historical landmarks of autophagy research. *Cell Res.* 2014;24(1):9-23.
- 547 2. Yang Z, Klionsky DJ. Mammalian autophagy: core molecular machinery and signaling regulation. *Curr*  
548 *Opin Cell Biol.* 2010;22(2):124-31.
- 549 3. Johansen T, Lamark T. Selective autophagy mediated by autophagic adapter proteins. *Autophagy.*  
550 2014;7(3):279-96.
- 551 4. Bradfute SB, Castillo EF, Arko-Mensah J, Chauhan S, Jiang S, Mandell M, et al. Autophagy as an immune  
552 effector against tuberculosis. *Curr Opin Microbiol.* 2013;16(3):355-65.
- 553 5. Deretic V, Saitoh T, Akira S. Autophagy in infection, inflammation and immunity. *Nat Rev Immunol.*  
554 2013;13(10):722-37.
- 555 6. Mostowy S, Cossart P. Bacterial autophagy: restriction or promotion of bacterial replication? *Trends*  
556 *Cell Biol.* 2012;22(6):283-91.
- 557 7. Ponpuak M, Davis AS, Roberts EA, Delgado MA, Dinkins C, Zhao Z, et al. Delivery of cytosolic  
558 components by autophagic adaptor protein p62 endows autophagosomes with unique antimicrobial  
559 properties. *Immunity.* 2010;32(3):329-41.
- 560 8. Tiberi S, Buchanan R, Caminero JA, Centis R, Arbex MA, Salazar M, et al. The challenge of the new  
561 tuberculosis drugs. *Presse Med.* 2017;46(2 Pt 2):e41-e51.
- 562 9. Kumar D, Nath L, Kamal MA, Varshney A, Jain A, Singh S, et al. Genome-wide analysis of the host  
563 intracellular network that regulates survival of *Mycobacterium tuberculosis*. *Cell.* 2010;140(5):731-43.
- 564 10. Gutierrez MG, Master SS, Singh SB, Taylor GA, Colombo MI, Deretic V. Autophagy is a defense  
565 mechanism inhibiting BCG and *Mycobacterium tuberculosis* survival in infected macrophages. *Cell.*  
566 2004;119(6):753-66.

- 567 11. Alonso S, Pethe K, Russell DG, Purdy GE. Lysosomal killing of *Mycobacterium* mediated by ubiquitin-  
568 derived peptides is enhanced by autophagy. Proceedings of the National Academy of Sciences.  
569 2007;104:6031-6.
- 570 12. Deretic V. Autophagy in leukocytes and other cells: mechanisms, subsystem organization, selectivity,  
571 and links to innate immunity. J Leukoc Biol. 2016;100(5):969-78.
- 572 13. Watson RO, Manzanillo PS, Cox JS. Extracellular M. tuberculosis DNA targets bacteria for autophagy  
573 by activating the host DNA-sensing pathway. Cell. 2012;150(4):803-15.
- 574 14. Manzanillo PS, Ayres JS, Watson RO, Collins AC, Souza G, Rae CS, et al. The ubiquitin ligase parkin  
575 mediates resistance to intracellular pathogens. Nature. 2013;501(7468):512-6.
- 576 15. Kimmey JM, Huynh JP, Weiss LA, Park S, Kambal A, Debnath J, et al. Unique role for ATG5 in neutrophil-  
577 mediated immunopathology during M. tuberculosis infection. Nature. 2015;528(7583):565-9.
- 578 16. Ramakrishnan L. Looking Within the Zebrafish to Understand the Tuberculous Granuloma. The New  
579 Paradigm of Immunity to Tuberculosis. 2013;83.
- 580 17. Meijer AH. Protection and pathology in TB: learning from the zebrafish model. Semin Immunopathol.  
581 2016;38(2):261-73.
- 582 18. Davis JMC, Hilary , Lewis JL, Ghori N, Herbomel P, Ramakrishnan L. Real-Time Visualization of  
583 Mycobacterium-Macrophage Interactions Leading to Initiation of Granuloma Formation in Zebrafish  
584 Embryos. Immunity. 2002;17:693-702.
- 585 19. Ramakrishnan L. Revisiting the role of the granuloma in tuberculosis. Nat Rev Immunol.  
586 2012;12(5):352-66.
- 587 20. Hosseini R, Lamers GE, Hodzic Z, Meijer AH, Schaaf MJ, Spaink HP. Correlative light and electron  
588 microscopy imaging of autophagy in a zebrafish infection model. Autophagy. 2014;10(10):1844-57.

- 589 21. van der Vaart M, Korbee CJ, Lamers GE, Tengeler AC, Hosseini R, Haks MC, et al. The DNA damage-  
590 regulated autophagy modulator DRAM1 links mycobacterial recognition via TLR-MYD88 to autophagic  
591 defense [corrected]. *Cell Host Microbe*. 2014;15(6):753-67.
- 592 22. Zheng YT, Shahnazari S, Brech A, Lamark T, Johansen T, Brumell JH. The adaptor protein p62/SQSTM1  
593 targets invading bacteria to the autophagy pathway. *J Immunol*. 2009;183(9):5909-16.
- 594 23. Wild P, Farhan H, McEwan DG, Wagner S, Rogov VV, Brady NR, et al. Phosphorylation of the autophagy  
595 receptor optineurin restricts Salmonella growth. *Science*. 2011;333(6039):228-33.
- 596 24. Slowicka K, Vereecke L, Mc Guire C, Sze M, Maelfait J, Kolpe A, et al. Optineurin deficiency in mice is  
597 associated with increased sensitivity to Salmonella but does not affect proinflammatory NF-kappaB  
598 signaling. *Eur J Immunol*. 2016;46(4):971-80.
- 599 25. Pilli M, Arko-Mensah J, Ponpuak M, Roberts E, Master S, Mandell MA, et al. TBK-1 promotes  
600 autophagy-mediated antimicrobial defense by controlling autophagosome maturation. *Immunity*.  
601 2012;37(2):223-34.
- 602 26. Seto S, Tsujimura K, Horii T, Koide Y. Autophagy Adaptor Protein p62/SQSTM1 and Autophagy-Related  
603 Gene Atg5 Mediate Autophagosome Formation in Response to Mycobacterium tuberculosis Infection  
604 in Dendritic Cells. *PLOS ONE*. 2013;8(12):e86017.
- 605 27. Benard EL, Rougeot J, Racz PI, Spaink HP, Meijer AH. Transcriptomic Approaches in the Zebrafish Model  
606 for Tuberculosis-Insights Into Host- and Pathogen-specific Determinants of the Innate Immune  
607 Response. *Adv Genet*. 2016;95:217-51.
- 608 28. Davis JM, Ramakrishnan L. The role of the granuloma in expansion and dissemination of early  
609 tuberculous infection. *Cell*. 2009;136(1):37-49.
- 610 29. Yang CT, Cambier CJ, Davis JM, Hall CJ, Crosier PS, Ramakrishnan L. Neutrophils exert protection in the  
611 early tuberculous granuloma by oxidative killing of mycobacteria phagocytosed from infected  
612 macrophages. *Cell Host Microbe*. 2012;12(3):301-12.



- 613 30. He C, Bartholomew CR, Zhou W, Klionsky DJ. Assaying autophagic activity in transgenic GFP-Lc3 and  
614 GFP-Gabarap zebrafish embryos. *Autophagy*. 2009;5(4):520-6.
- 615 31. Levitte S, Adams KN, Berg RD, Cosma CL, Urdahl KB, Ramakrishnan L. Mycobacterial Acid Tolerance  
616 Enables Phagolysosomal Survival and Establishment of Tuberculous Infection In Vivo. *Cell Host  
617 Microbe*. 2016;20(2):250-8.
- 618 32. Yuan N, Song L, Zhang S, Lin W, Cao Y, Xu F, et al. Bafilomycin A1 targets both autophagy and apoptosis  
619 pathways in pediatric B-cell acute lymphoblastic leukemia. *Haematologica*. 2015;100(3):345-56.
- 620 33. Mostowy S. Autophagy and bacterial clearance: a not so clear picture. *Cell Microbiol*. 2013;15(3):395-  
621 402.
- 622 34. Stanley SA, Barczak AK, Silvis MR, Luo SS, Sogi K, Vokes M, et al. Identification of host-targeted small  
623 molecules that restrict intracellular *Mycobacterium tuberculosis* growth. *PLoS Pathog*.  
624 2014;10(2):e1003946.
- 625 35. Kolloli A, Subbian S. Host-Directed Therapeutic Strategies for Tuberculosis. *Front Med (Lausanne)*.  
626 2017;4:171.
- 627 36. Behar SM, Baehrecke EH. Autophagy is not the answer. *NATURE*. 2015;528:482-3.
- 628 37. Swaim LE, Connolly LE, Volkman HE, Humbert O, Born DE, Ramakrishnan L. *Mycobacterium marinum*  
629 infection of adult zebrafish causes caseating granulomatous tuberculosis and is moderated by adaptive  
630 immunity. *Infect Immun*. 2006;74(11):6108-17.
- 631 38. Katsuragi Y, Ichimura Y, Komatsu M. p62/SQSTM1 functions as a signaling hub and an autophagy  
632 adaptor. *FEBS J*. 2015;282(24):4672-8.
- 633 39. Slowicka K, van Loo G. Optineurin Functions for Optimal Immunity. *Front Immunol*. 2018;9:769.
- 634 40. Deretic V. Autophagy in tuberculosis. *Cold Spring Harb Perspect Med*. 2014;4(11):a018481.
- 635 41. Kimmey JM, Stallings CL. Bacterial Pathogens versus Autophagy: Implications for Therapeutic  
636 Interventions. *Trends Mol Med*. 2016;22(12):1060-76.

- 637 42. Zhu G, Wu CJ, Zhao Y, Ashwell JD. Optineurin negatively regulates TNFalpha- induced NF-kappaB  
638 activation by competing with NEMO for ubiquitinated RIP. *Curr Biol.* 2007;17(16):1438-43.
- 639 43. Duran A, Linares JF, Galvez AS, Wikenheiser K, Flores JM, Diaz-Meco MT, et al. The signaling adaptor  
640 p62 is an important NF-kappaB mediator in tumorigenesis. *Cancer Cell.* 2008;13(4):343-54.
- 641 44. Tschurtschenthaler M, Adolph TE. The Selective Autophagy Receptor Optineurin in Crohn's Disease.  
642 *Frontiers in Immunology.* 2018;9(766).
- 643 45. Chew TS, O'Shea NR, Sewell GW, Oehlers SH, Mulvey CM, Crosier PS, et al. Optineurin deficiency in  
644 mice contributes to impaired cytokine secretion and neutrophil recruitment in bacteria-driven colitis.  
645 *Disease Models & Mechanisms.* 2015;8(8):817-29.
- 646 46. Smith AM, Sewell GW, Levine AP, Chew TS, Dunne J, O'Shea NR, et al. Disruption of macrophage pro-  
647 inflammatory cytokine release in Crohn's disease is associated with reduced optineurin expression in  
648 a subset of patients. *Immunology.* 2015;144(1):45-55.
- 649 47. Labun K, Montague TG, Gagnon JA, Thyme SB, Valen E. CHOPCHOP v2: a web tool for the next  
650 generation of CRISPR genome engineering. *Nucleic Acids Res.* 2016;44(W1):W272-6.
- 651 48. Benard EL, van der Sar AM, Ellett F, Lieschke GJ, Spaink HP, Meijer AH. Infection of zebrafish embryos  
652 with intracellular bacterial pathogens. *J Vis Exp.* 2012(61).
- 653 49. Stoop EJM, Schipper T, Rosendahl Huber SK, Nezhinsky AE, Verbeek FJ, Gurcha SS, et al. Zebrafish  
654 embryo screen for mycobacterial genes involved in the initiation of granuloma formation reveals a  
655 newly identified ESX-1 component. *Disease Models & Mechanisms.* 2011;4(4):526-36.
- 656 50. Stockhammer OW, Zakrzewska A, Hegedüs Z, Spaink HP, Meijer AH. Transcriptome Profiling and  
657 Functional Analyses of the Zebrafish Embryonic Innate Immune Response to *Salmonella* Infection. *The*  
658 *Journal of Immunology.* 2009;182(9):5641-53.

## 659 **Figure Legends**

660

661 **Fig 1. Ubiquitination and autophagy activity can be induced by Mm infection**

662 (A) Schematic diagram of the zebrafish Mm infection model for TB study. *Mycobacterium*  
663 *marinum* (Mm) strain 20 fluorescently labelled with mCherry was microinjected into the blood  
664 island of embryos at 28 hpf. Red dots represent small clusters of Mm-infected cells visible from 1  
665 dpi. At 3 dpi these Mm clusters have grown into early stage granulomas.

666 (B) Representative confocal micrographs of GFP-Lc3 co-localization with Mm clusters in infected  
667 embryos/larvae at 1, 2 and 3 days post infection (dpi). Scale bars, 10  $\mu$ m.

668 (C) Quantification of the percentage of Mm clusters positive for GFP-Lc3 at 1 and 2 dpi. The results  
669 are representative for two individual repeats ( $\geq 20$  embryo/group). ns, non-  
670 significant, \* $p < 0.05$ , \*\* $p < 0.01$ , \*\*\* $p < 0.001$ .

671 (D) Western blot determination of Lc3 protein levels in infected and uninfected embryos/larvae  
672 at 1, 2 and 3 dpi. Protein samples were extracted from 1, 2 and 3 dpi infected and uninfected  
673 larvae ( $>10$  larvae/sample). The blots were probed with antibodies against Lc3 and Actin as a  
674 loading control. Western blot was representative for three independent experimental repeats.

675 (E) Representative confocal micrographs of Ubiquitin co-localization with Mm clusters in infected  
676 embryos/larvae at 1, 2 and 3 days post infection (dpi). Scale bars, 10  $\mu$ m.

677 (F) Quantification of the percentage of Mm clusters positive for ubiquitin staining at 1 and 2 dpi  
678 ( $\geq 10$  embryo/group). The results are representative for two individual repeats. ns, non-  
679 significant, \* $p < 0.05$ , \*\* $p < 0.01$ , \*\*\* $p < 0.001$ .

680 (G) Western blot analysis of ubiquitination levels in infected and uninfected embryos/larvae at 1,  
681 2 and 3 dpi. Protein samples were extracted from 1, 2 and 3 dpi infected and uninfected larvae  
682 ( $>10$  larvae/sample). The blots were probed with an antibody detecting both poly and mono

683 ubiquitin and with anti-Actin antibody as a loading control. Western blot representative for three  
684 independent experimental repeats.

685 (H) Representative confocal micrographs of GFP-Lc3 and Ubiquitin co-localization with Mm  
686 clusters in infected larvae at 3 dpi. Scale bars, 10  $\mu$ m.

687

## 688 **Fig 2. Generation of Optineurin and p62 mutant lines**

689 (A) Schematic representation of the Optn and p62 genetic and protein domain architecture and  
690 CRISPR target site. Optn (517 aa) and p62 (452 aa) both contain a Lc3 interaction region domain  
691 (LIR) and ubiquitin binding domains (UBAN in Optn and UBA in p62). Additionally, two coiled-coil  
692 motifs (CC) in Optineurin and the PHOX/Bem1p (PB) and Zinc Finger (ZZ) domains of p62 are  
693 indicated. The gene loci are shown with coding exons as grey boxes (14 in Optn and 8 in p62) and  
694 introns as solid black lines (large introns not drawn to scale). The position of the CRISPR target  
695 site sequences at the beginning of exon 2 in Optineurin and exon 3 in p62 are indicated and the  
696 predicted truncated proteins in the mutant lines are drawn above.

697 (B) Schematic diagram of the generation of Optn and P62 mutant lines. Target-specific sgRNA and  
698 Cas9 mRNAs were co-injected into one cell stage embryos (AB/TL WT line). Founders were  
699 outcrossed to *Tg(CMV:EGFP-Lc3)* fish and the F1 was incrossed to obtain homozygous mutant and  
700 wild type F2 siblings.

701 (C) Sanger sequencing of WT and mutant F2 fish. Red lines indicate CRISPR target sites. The Optn  
702 and p62 mutant sequences contain deletions (indels) of 5 and 37 nucleotides, respectively. (D)  
703 Confirmation of CRISPR mutation effect by Western blot analysis. Protein samples were extracted  
704 from 4 dpf *optn* or 3dpf *p62* mutant and WT larvae (>10 embryos/sample) and Western blots

705 were repeated at least three times with independent extracts. The blots were probed with  
706 antibodies against Optn or P62 and Actin as a loading control. Optn/Actin and P62/Actin ratios)  
707 are indicated below. kDa, kilodalton.

708 (E) Segregation from F1 heterozygous incross. Genotypes of adult fish (>3 months) combined from  
709 4 (for *optn*) or 3 (*p62*) independent breedings were confirmed by PCR and sequencing.

710 (F) *optn* and *p62* mRNA was detected by quantitative PCR. Total RNA was isolated from 4dpf of  
711 *optn*<sup>+/+</sup>, *optn*<sup>Δ5n/Δ5n</sup>, *p62*<sup>+/+</sup> and *p62*<sup>Δ37n/Δ37n</sup> embryos (>10 embryos/sample) from three biological  
712 replicates.

713

### 714 **Fig 3. Optineurin or p62 deficiency affects autophagosome formation**

715 (A) Workflow of the experiments shown in (B-G). 3.5 dpf larvae were treated with Bafilomycin A1  
716 (Baf A1) (100 nM) for 12h. The GFP-Lc3 negative larvae were selected to assay autophagy activity  
717 by Western blot, the GFP-Lc3 positive larvae were collected to monitor autophagic activity using  
718 confocal imaging. The red square indicates the region for confocal imaging.

719 (B) The level of basal autophagy in WT and mutant embryos in absence or presence of Baf A1.  
720 Protein samples were extracted from 4 dpf WT and mutant larvae (>10 embryos/sample). The  
721 blots were probed with antibodies against Lc3 and Actin as a loading control. Western blots were  
722 repeated at least three times with independent extracts.

723 (C) Quantification of Lc3-II fold changes in WT and mutant embryos in absence or presence of Baf  
724 A1. Western blot band intensities were quantified by Lab Image. Data is combined from three  
725 independent experiments.

726 (D) Representative confocal micrographs of GFP-Lc3 puncta present in the tail fin of *optn*<sup>+/+</sup>,  
727 *optn*<sup>Δ5n/Δ5n</sup>, *p62*<sup>+/+</sup> and *p62*<sup>Δ37n/Δ37n</sup> at 4 dpf. Scale bars, 10 μm. E. Quantification of the number of  
728 GFP-Lc3 puncta in *optn*<sup>+/+</sup>, *optn*<sup>Δ5n/Δ5n</sup>, *p62*<sup>+/+</sup> and *p62*<sup>Δ37n/Δ37n</sup> larvae with and without Baf A1  
729 treatment. Each larva was imaged at a pre-defined region of the tail fin (as indicated by the red  
730 boxed area in Fig3 A) (≥6 larvae/group). Results are representative of two independent  
731 experiments.

732

#### 733 **Fig 4. Optineurin or p62 deficiency leads to increased susceptibility to Mm infection**

734 (A) Workflow of the experiments shown in (B-D). *optn* or *p62* MO were injected into the one cell  
735 stage of embryos and infection was performed at 28 hpf with 200 CFU of Mm via blood island  
736 microinjection. Bacterial quantification was done at 3dpi.

737 (B-D) Mm infection burden in *optn* and *p62* mutant larvae (B), under *optn* and *p62* MO knockdown  
738 conditions (C), and following injection of *p62* MO or *optn* MO in *optn* and *p62* mutants,  
739 respectively (D). The data are accumulated from three independent infection experiments. Each  
740 dot represents an individual larva. ns, non-significant, \*p<0.05, \*\*p<0.01, \*\*\*p<0.001.

741

742

743 **Fig 5. Optineurin or p62 deficiency inhibits targeting of Mm by GFP-Lc3**

744 (A) Workflow of the experiment shown in B. 2 dpi fixed larvae were used for confocal imaging.

745 The entire caudal hematopoietic tissue (CHT) was imaged, as indicated by the black box.

746 (B) Representative confocal micrographs of GFP-Lc3 co-localization with Mm clusters in infected

747 larvae. The top image shows the entire CHT region in *optn*<sup>+/+</sup> infected larvae. The area indicated

748 by the white box is detailed below. The bottom images show GFP-Lc3 co-localization of Mm

749 clusters in *optn*<sup>+/+</sup>, *optn*<sup>Δ5n/Δ5n</sup>, *p62*<sup>+/+</sup> and *p62*<sup>Δ37n/Δ37n</sup> infected larvae. The arrowheads indicate the

750 overlap between GFP-Lc3 and Mm clusters. Scale bars, 10 μm.

751 (C) Quantification of the percentage of Mm clusters positive for GFP-Lc3 vesicles. The data is

752 accumulated from two independent experiments; each dot represents an individual larva (≥12

753 larvae/group). ns, non-significant, \*p<0.05, \*\*p<0.01, \*\*\*p<0.001.

754 (D) Lc3 protein levels were determined by Western blot in infected and uninfected larvae. Protein

755 samples were extracted from 4 dpf larvae (>10 larvae/sample). The blots were probed with

756 antibodies against Lc3 and Actin as a loading control. Western blots were repeated two times

757 with independent extracts.

758

759 **Fig 6. Transient overexpression *optn* or *p62* mRNA protects against Mm infection**

760 (A) Workflow representing the experimental design in (B-C). *optn* or *p62* mRNA was injected into

761 the one cell stage of embryos (*AB/TL*) at a dosage of 100 pg/embryo. Injected embryos were

762 collected at 28 hpf for confirmation of the overexpression by Western blot analysis. Embryos were

763 infected at 28hpf with 200 CFU Mm via the blood island by microinjection and bacterial burden

764 was determined at 3 dpi.

765 (B) Western blot analysis to test the effect of transient overexpression of *optn* or *p62* mRNA.  
766 Protein extracts were made from >20 mRNA-injected or control embryos per group. The blots  
767 were probed with antibodies against Optineurin or p62 and Actin as a loading control. Similar  
768 results were observed in two independent experiments.

769 (C) Quantification of Mm infection burden in embryos injected with full length or  $\Delta$ LIR/ $\Delta$ UBAN  
770 deletion mRNAs of *optn* and *p62*. Accumulated data from two independent infection experiments  
771 is shown. ns, non-significant, \* $p < 0.05$ , \*\* $P < 0.01$ , \*\*\* $p < 0.001$ .

772

773

774 **Fig 7. Transient overexpression of *optn* or *p62* mRNA promotes GFP-Lc3 recruitment to Mm**  
775 **clusters**

776 (A) Workflow of the experiments in (B-C). *optn* or *p62* mRNA was injected into the one cell stage  
777 of embryos at a dosage of 100 pg/embryo. 2 dpi fixed larvae were used for confocal imaging. The  
778 entire caudal hematopoietic tissue (CHT) was imaged, as indicated by the black box.

779 (B) Representative confocal micrographs of GFP-Lc3 co-localization with Mm clusters in larvae  
780 injected with full length or  $\Delta$ LIR/ $\Delta$ UBAN deletion mRNAs of *optn* and *p62*. The arrowheads  
781 indicate the overlap between GFP-Lc3 and Mm clusters. Scale bars, 10  $\mu$ m.

782 (C) Quantification of the percentage of Mm clusters positive for GFP-Lc3 vesicles. Each dot  
783 represents an individual larva ( $\geq 7$  larvae/group). Results are representative of two independent  
784 experiments. ns, non-significant, \* $p < 0.05$ , \*\* $P < 0.01$ , \*\*\* $p < 0.001$ .

785



## 786 **Supplementary Figure Legends**

787

788

### 789 **S1 Fig. Optineurin and p62 are highly conserved between zebrafish and human**

790 (A) Representative images of *WT* and mutant F2 embryos at 4dpf. Scale bars, 250  $\mu$ m.

791 (B) Phylogenetic tree of SLR amino acid sequences. Optineurin, p62, NDP52( Calcoco2), NBRC1 and

792 TAX1BP1 sequences were searched from the NCBI Ensembl database and the accession numbers

793 are listed in S6 Table. MUSCLE online server was used to generate the protein alignment. The

794 best-fitting amino acid replacement model to the alignment (JTT) was determined using ProtTest

795 3.2 based on the Akaike Information Criterion (AIC). Finally, the maximum likelihood gene tree

796 was estimated with PhyML 3.0 and represented in FigTree v1.3.1

797 (<http://tree.bio.ed.ac.uk/software/figtree/>). Nodal confidence was calculated with non-

798 parametric bootstrap of 100 replicates.

799 (C) Protein sequence identity of SLRs between zebrafish and human. The percentage identity and

800 similarity was calculated using a Clustal Omega alignment.

801 (D) Alignment of LIR, UBAN and UBA motifs from the Optn and p62 sequences of different

802 vertebrates. Amino acid sequences of the LIR motifs of Optn and p62 from the indicated species

803 were aligned using Mega7 software (DNASTAR, Madison, WI) and aligned by the Clustal W2

804 method (EMBL, Cambridge, UK). The Ubiquitin binding domains of Optineurin or p62 were

805 determined by NCBI-BLASTP (<https://blast.ncbi.nlm.nih.gov/Blast.cgi?PAGE=ProTeins>).

806

807

808 **S2 Fig. Characterization of Optineurin and p62 mutant lines**

809 (A) Validation of Baf A1 effect on zebrafish by Western blot. Baf A1 treatment at dosages of 20,  
810 100 and 400 nM was performed by incubation for 12h in egg water. The protein samples were  
811 extracted from 4 dpf AB/TL larvae (>10 embryos/sample). The blots were probed with antibodies  
812 against Lc3 and Actin. (B) Detection of p62 or Optineurin protein in mutant lines in absence or  
813 presence of Baf A1. Protein samples were extracted from *optn*<sup>+/+</sup>, *optn*<sup>Δ5n/Δ5n</sup>, *p62*<sup>+/+</sup> and  
814 *p62*<sup>Δ37n/Δ37n</sup> larvae at 4 dpf (>10 embryos/sample). The blots were probed with antibodies against  
815 Optineurin, p62 and Actin as a loading control. Optineurin/Actin and p62/Actin ratios are  
816 indicated below.

817

818 **S3 Fig. Injection of *optn* or *p62* MO transiently knocks down the corresponding mRNA and**  
819 **protein.**

820 (A) Workflow representing the experimental design in (B-E). *optn* or *p62* MO were injected into  
821 one cell stage embryos (AB/TL), and injected embryos were collected for confirmation of the  
822 knockdown effect by RT-PCR and Western blot analysis (>20 embryos /Sample).

823 (B) Validation of the effect of *optn* splice-blocking MO e2i2 (targeting the splice event between  
824 exon 2 and intron 2) by RT-PCR on (a) the wild type control group, (b) embryos injected with  
825 0.1mM MO, or (c) embryos injected with 0.15 mM MO. The wild type PCR product is expected to  
826 be 400 bp in length.

827 (C) Validation of the effect of *p62* splice-blocking MO i1 e2 (targeting the splice event between  
828 intron 1 and exon 2) by RT-PCR on (a) the wild type control group, (b) embryos injected with  
829 0.5mM MO. The wild type PCR product is expected to be 200 bp in length.

830 (D and E) Validation of MO knockdown effect by Western blot analysis. The protein samples were  
831 exacted from 2 dpf AB/TL embryos injected with 0.1mM *optn* or 0.5 mM *p62* MO (>20  
832 embryos/sample). The blots were probed with antibodies against Optn or P62 and Actin.

833

834 **S4 Fig. Optineurin or p62 mutation reduces autophagosome formation during Mm infection**

835 (A) Representative confocal micrographs of GFP-Lc3 co-localization with Mm clusters in *optn*<sup>+/+</sup>,  
836 *optn*<sup>Δ5n/Δ5n</sup>, *p62*<sup>+/+</sup> and *p62*<sup>Δ37n/Δ37n</sup> infected embryos at 1 dpi. The arrowheads indicate the  
837 overlap between GFP-Lc3 and Mm clusters. Scale bars, 10 μm.

838 (B) Quantification of the percentage of Mm co-localizing with GFP-Lc3 in infected embryos at

839 1dpi (>6 embryo/group). ns, non-significant, \*p<0.05, \*\*P<0.01, \*\*\*p<0.001. (C) Autophagy

840 activity in Mm infected embryos. Protein samples were obtained from 3 dpi *optn*<sup>+/+</sup>, *optn*<sup>Δ5n/Δ5n</sup>,

841 *p62*<sup>+/+</sup> and *p62*<sup>Δ37n/Δ37n</sup> infected larvae with Baf A1 12 h treatment (>10 larvae/sample). The blots

842 were probed with antibodies against Lc3 and Actin.

843

844

845 **S5 Fig. Transient overexpression of *optn* or *p62* mRNA reduces the susceptibility to Mm**

846 (A,B) Quantification of Mm infection burden at 2dpi in embryos injected with full length or

847 ΔLIR/ΔUBAN deletion mRNAs of *optn* (A) and *p62* (B). Data are accumulated data from two

848 independent infection experiments. ns, non-significant, \*p<0.05, \*\*P<0.01, \*\*\*p<0.001.

849

850

851

852 **S6 Fig. Transient overexpression of *optn* or *p62* mRNA results in increased recruitment of GFP-**  
853 **Lc3 to Mm clusters at 1 dpi.**

854 (A) Representative confocal micrographs of GFP-Lc3 co-localization with Mm clusters in mRNA-  
855 injected larvae at 1 dpi. The arrowheads indicate the overlap between GFP-Lc3 and Mm clusters.  
856 Scale bars, 10  $\mu$ m.

857 (B) Quantification of the percentage of Mm clusters positive for GFP-Lc3 vesicles. ns, non-  
858 significant, \* $p < 0.05$ , \*\* $P < 0.01$ , \*\*\*  $p < 0.001$ . Data are accumulated from two independent  
859 experiments (>15embryo/group).

860

861

862 **Supplementary Tables**

863

864 **S1 Table. Zebrafish lines used**

865 **S2 Table. Target sites for CRISPR/Cas 9 systems**

866 **S3 Table. Primers for complementation and amplification of sgRNA**

867 **S4 Table. Morpholino sequences**

868 **S5 Table. Primers used in this study**

869 **S6 Table. Accession numbers of selective autophagy receptors**

870

871

872

873

874

875

876

877

878

879

880

**A**

bioRxiv preprint doi: <https://doi.org/10.1101/415463>; this version posted September 12, 2018. The copyright holder for this preprint (which was not certified by peer review) is the author/funder, who has granted bioRxiv a license to display the preprint in perpetuity. It is made available under aCC-BY 4.0 International license.

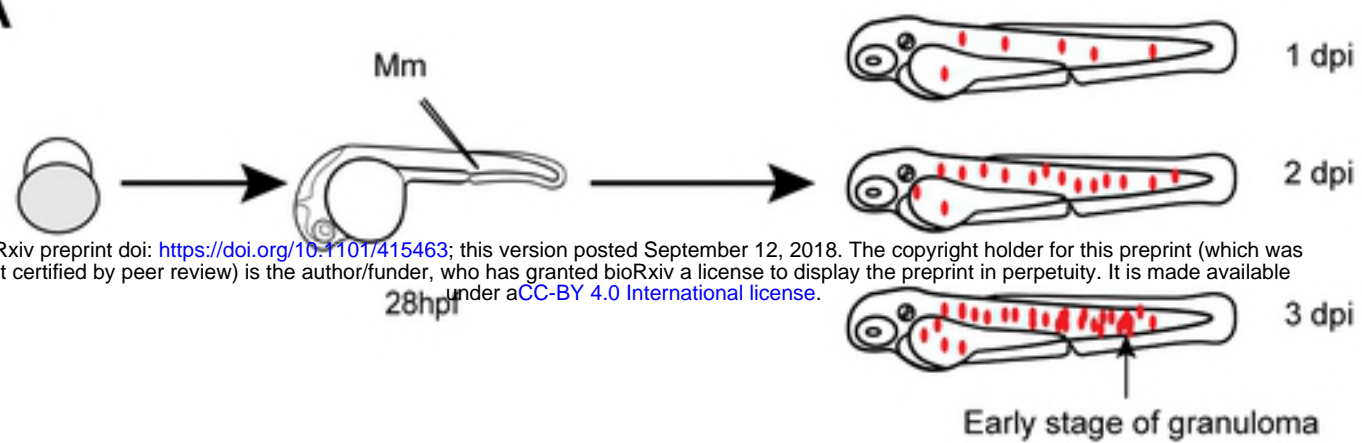**B**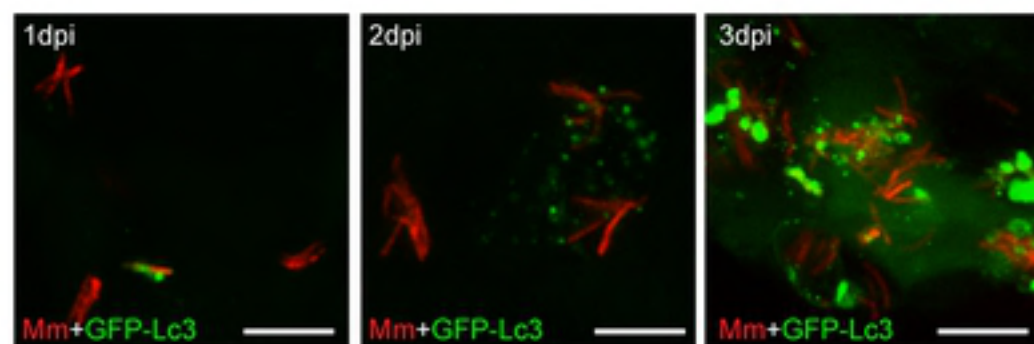**C**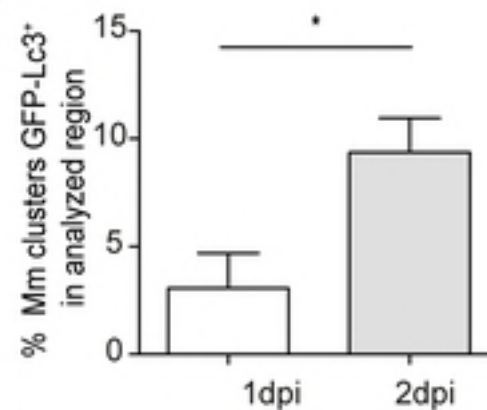**D**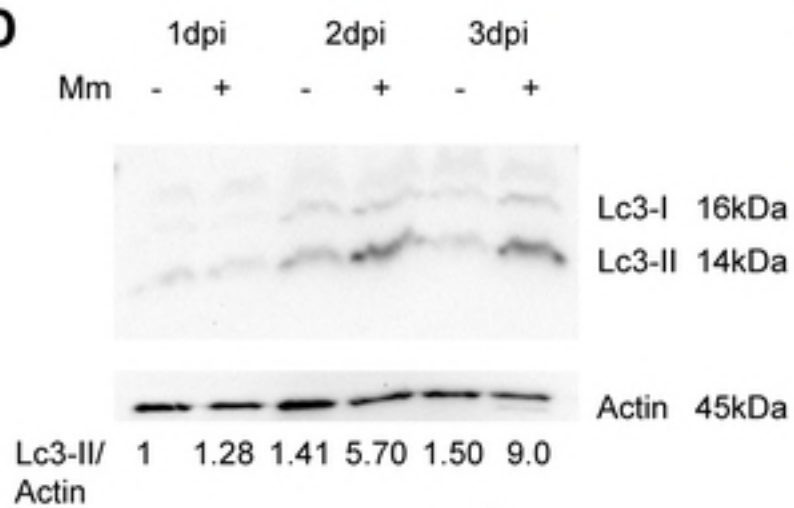**E**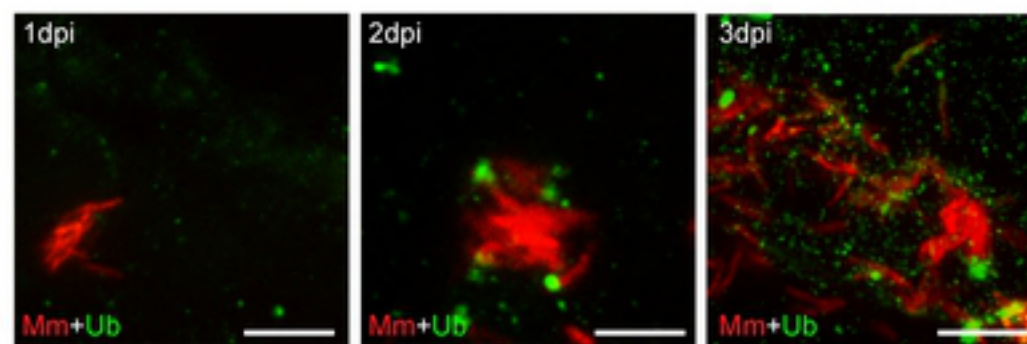**F**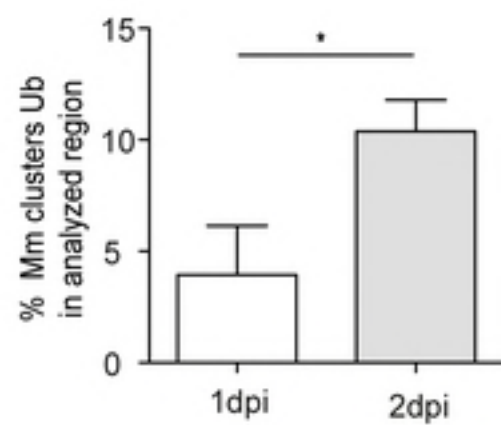**G**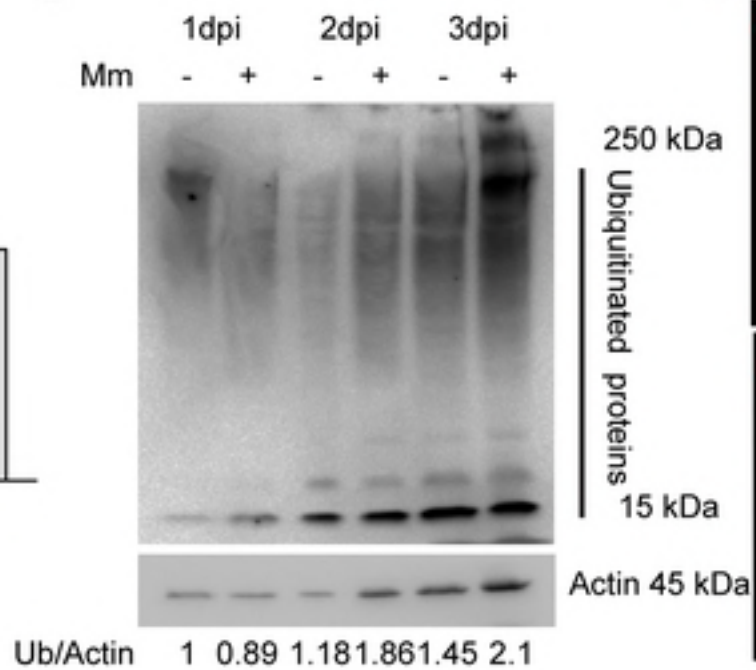**H**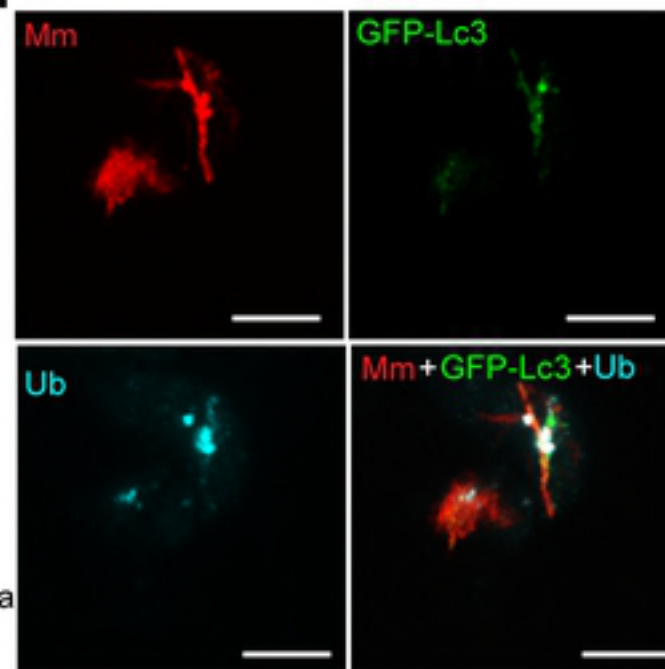

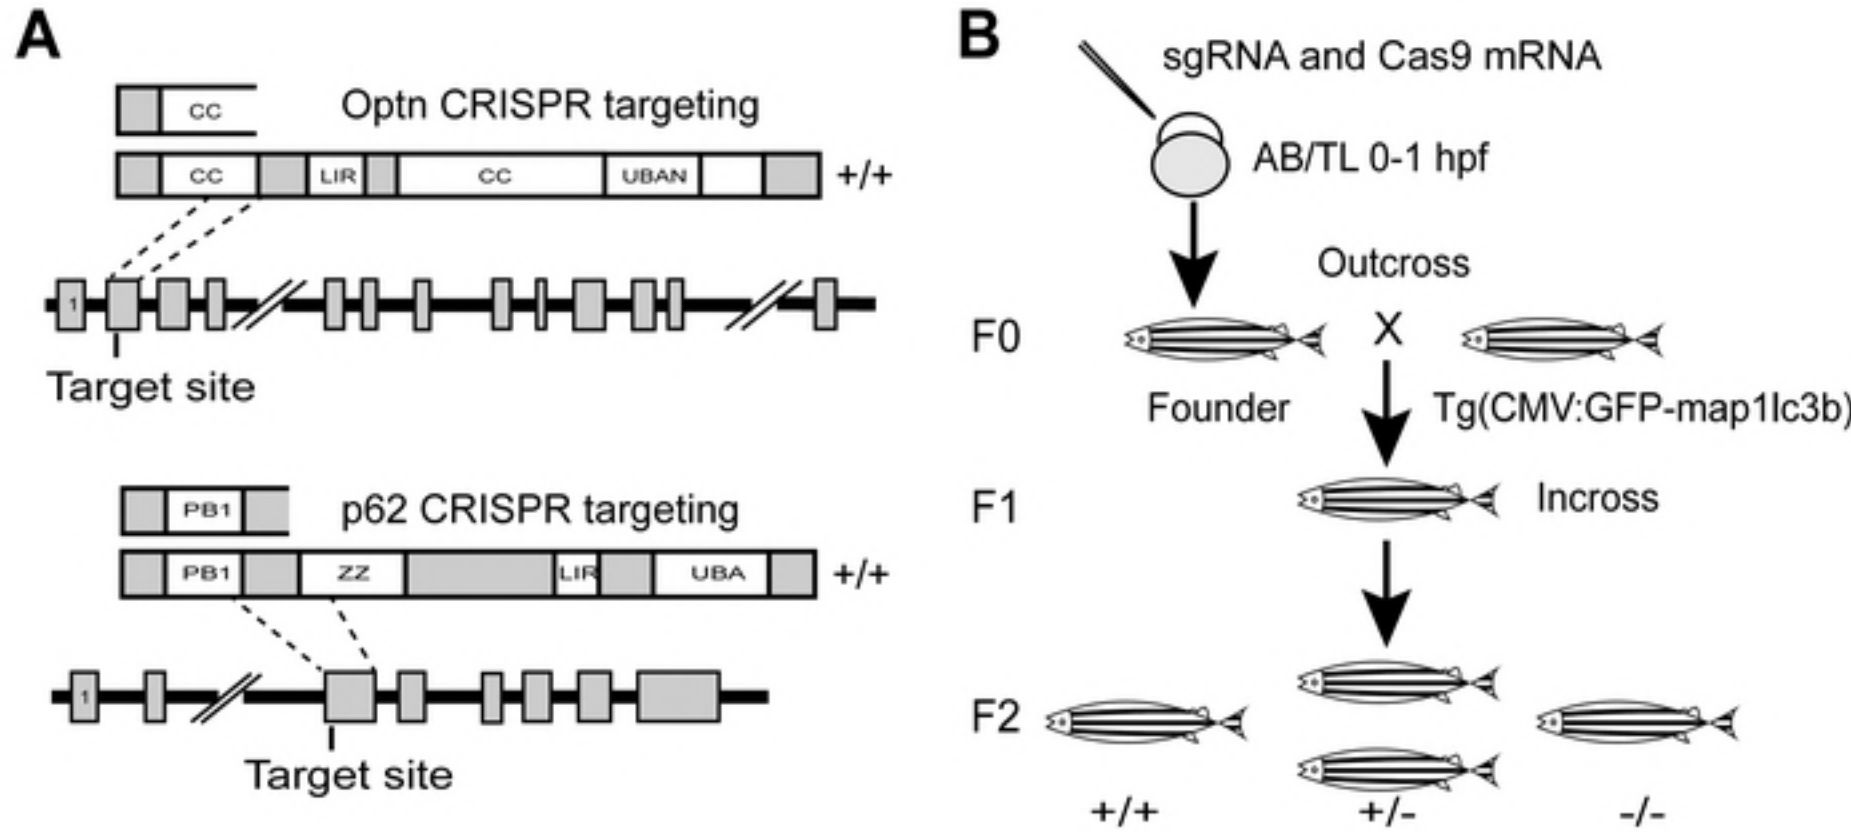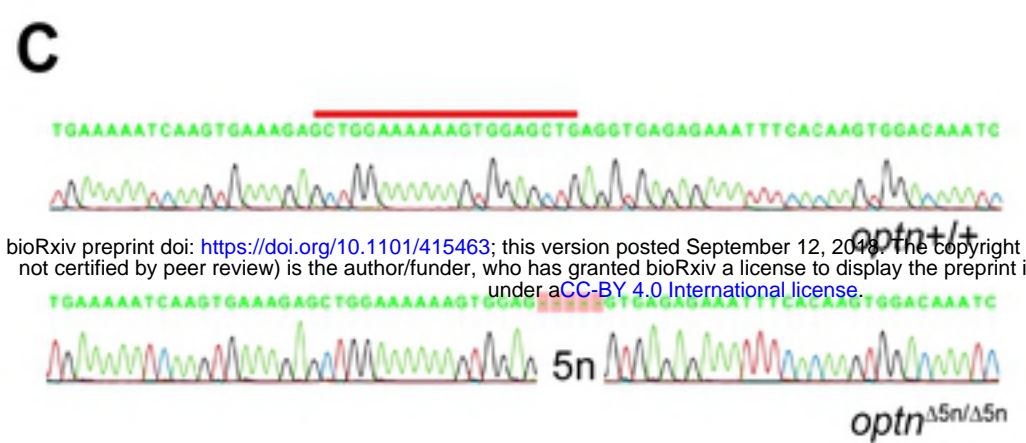

bioRxiv preprint doi: <https://doi.org/10.1101/415463>; this version posted September 12, 2018. The copyright holder for this preprint (which was not certified by peer review) is the author/funder, who has granted bioRxiv a license to display the preprint in perpetuity. It is made available under aCC-BY 4.0 International license.

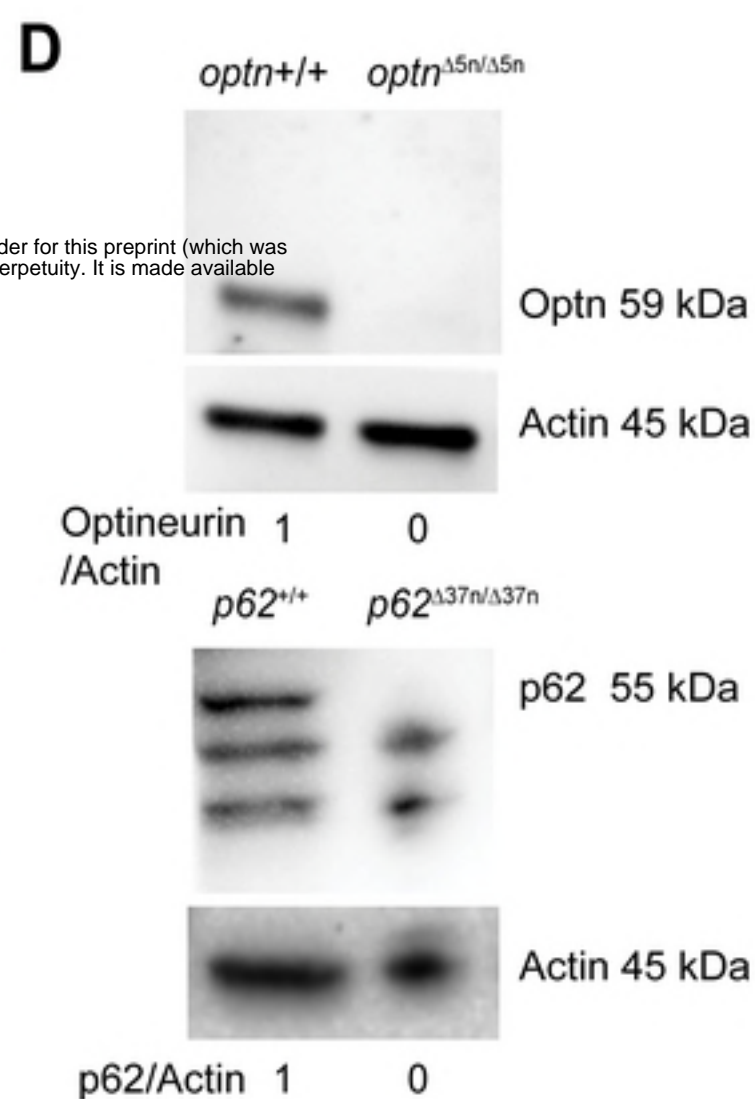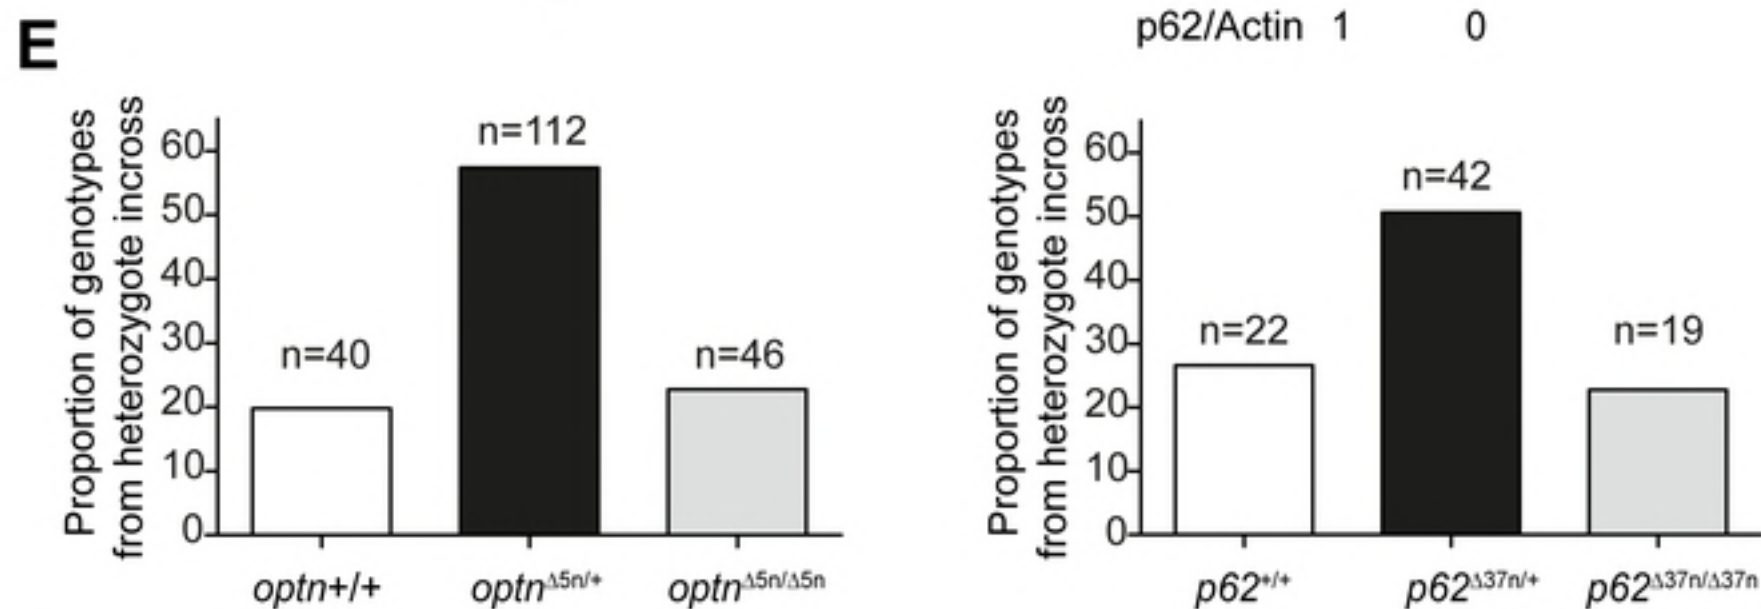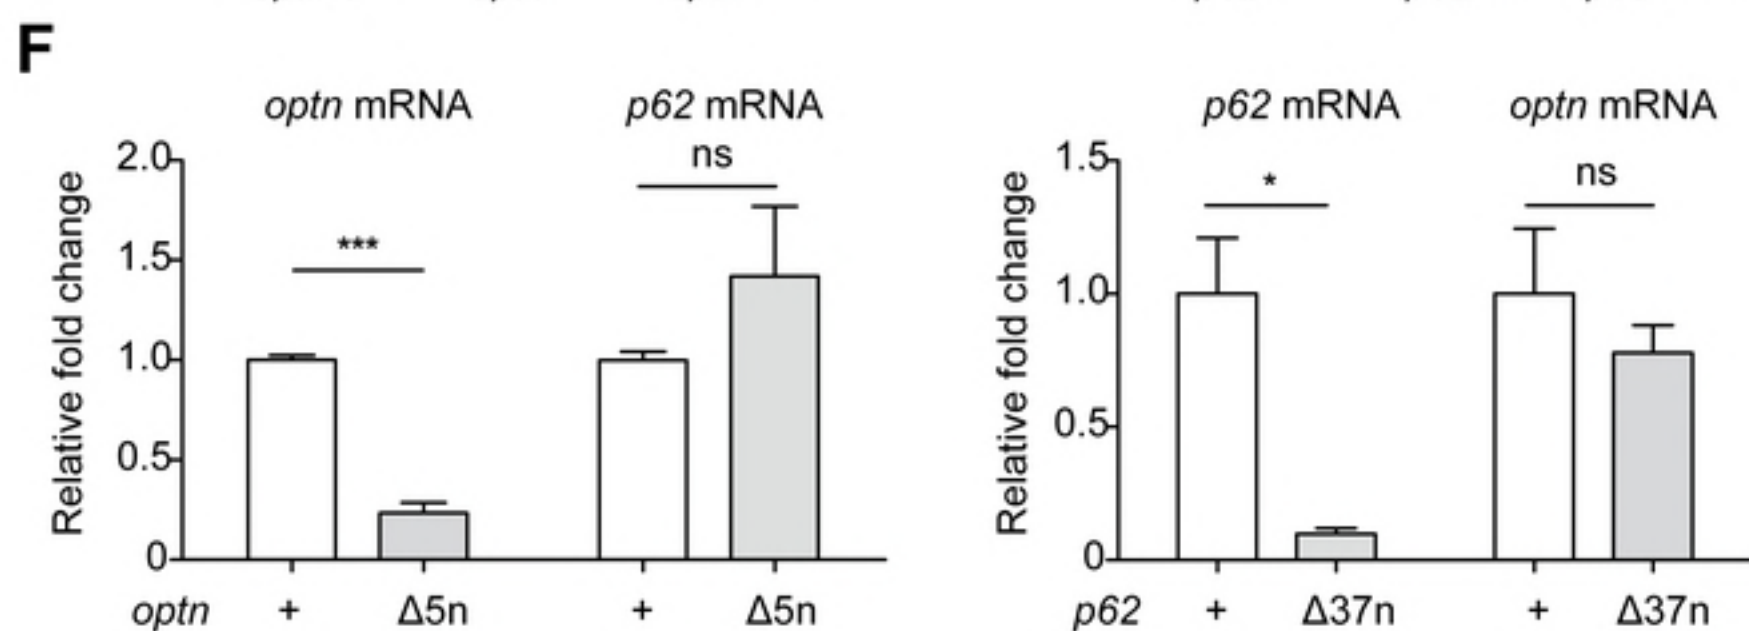

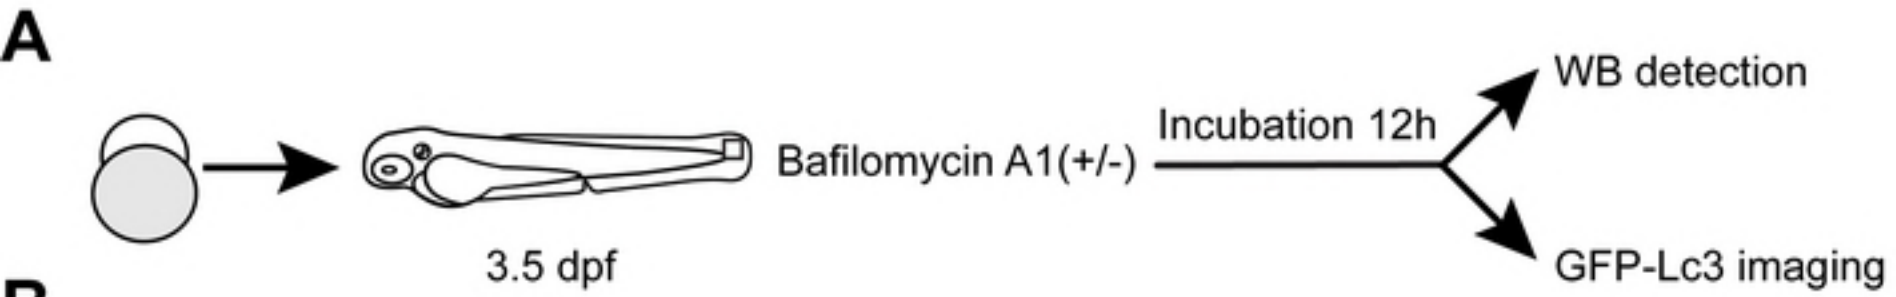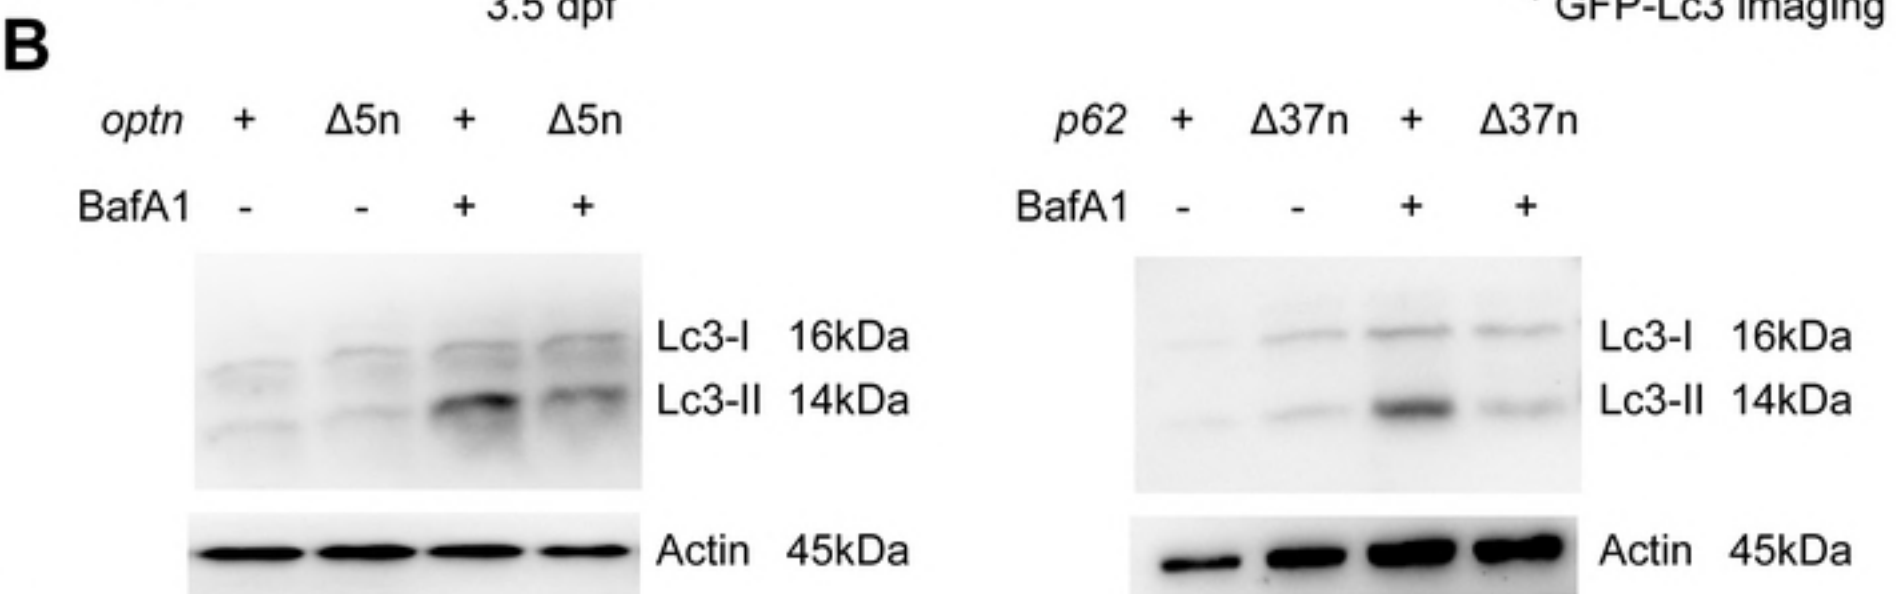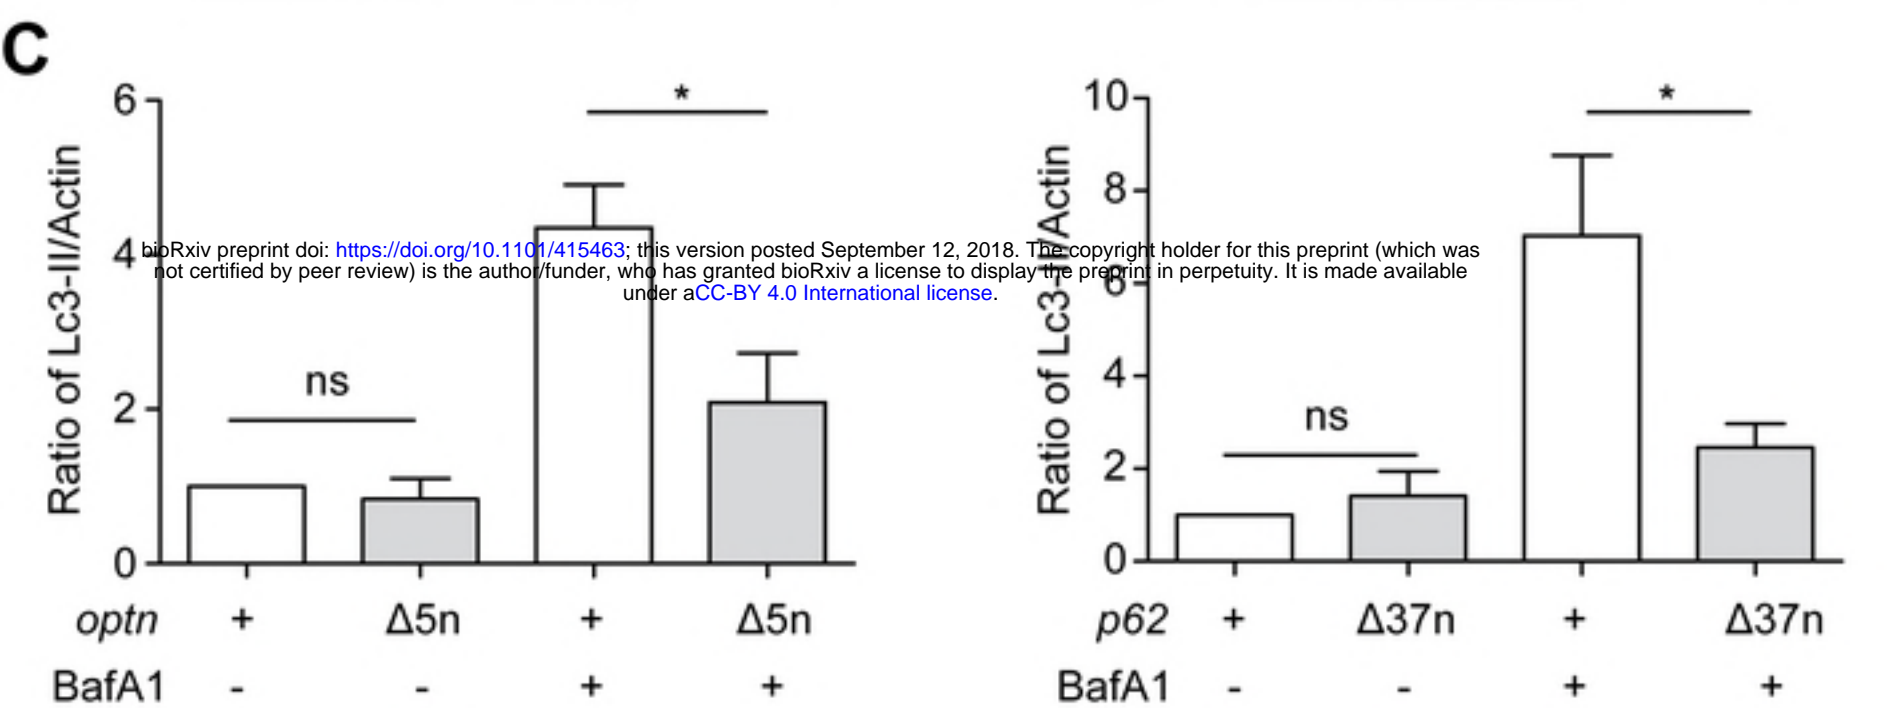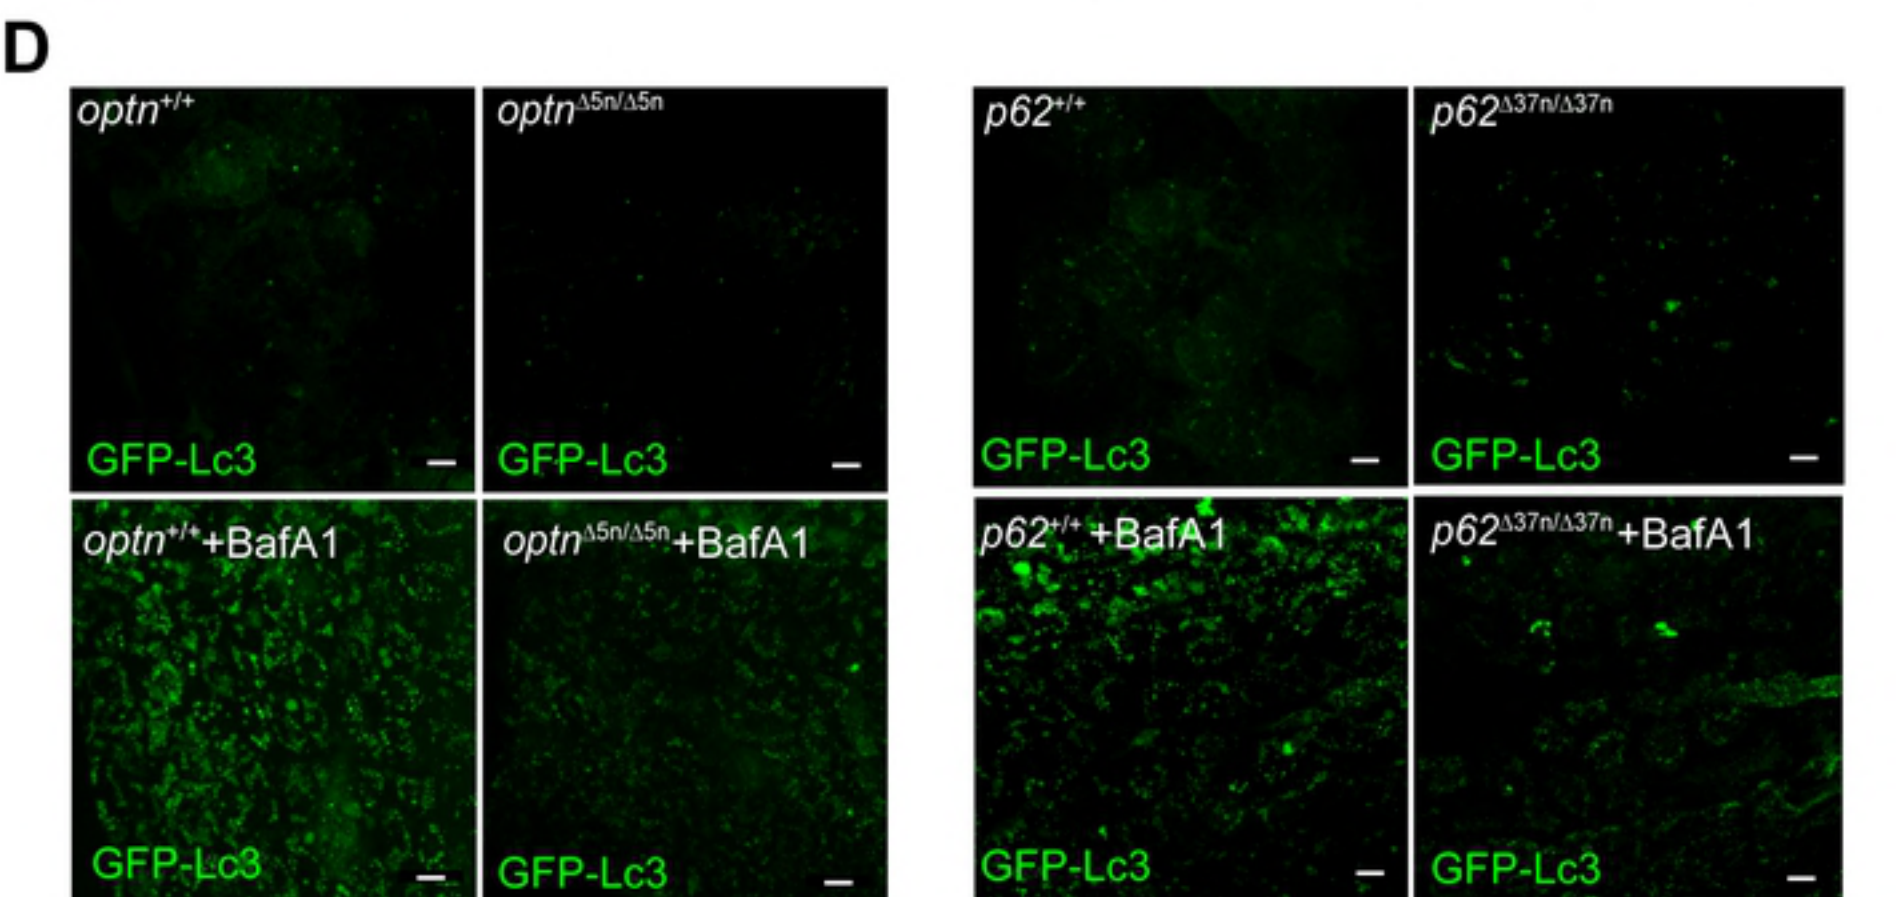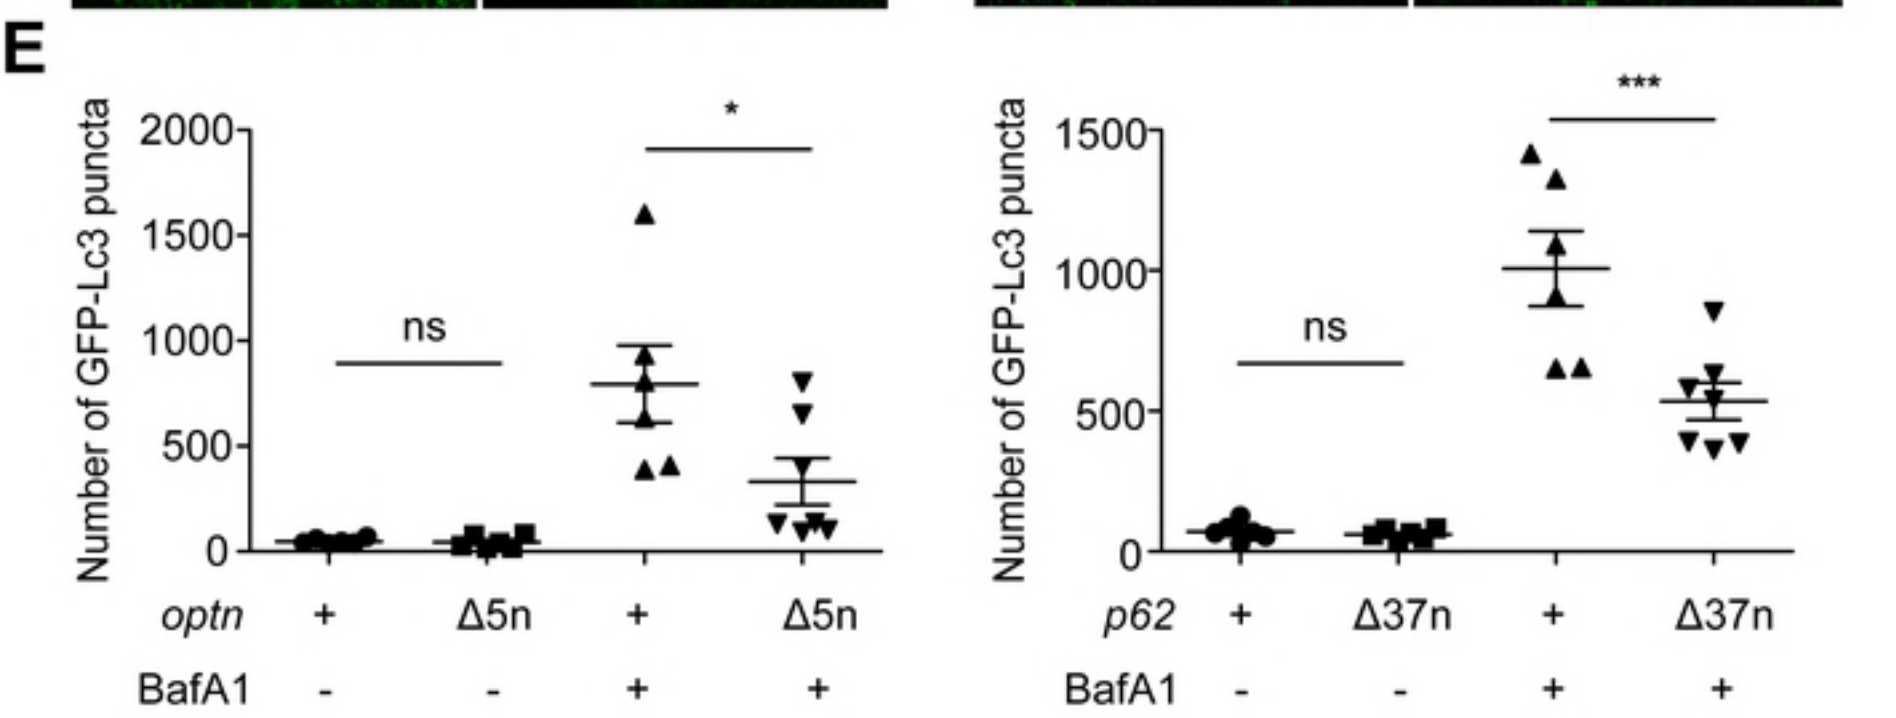



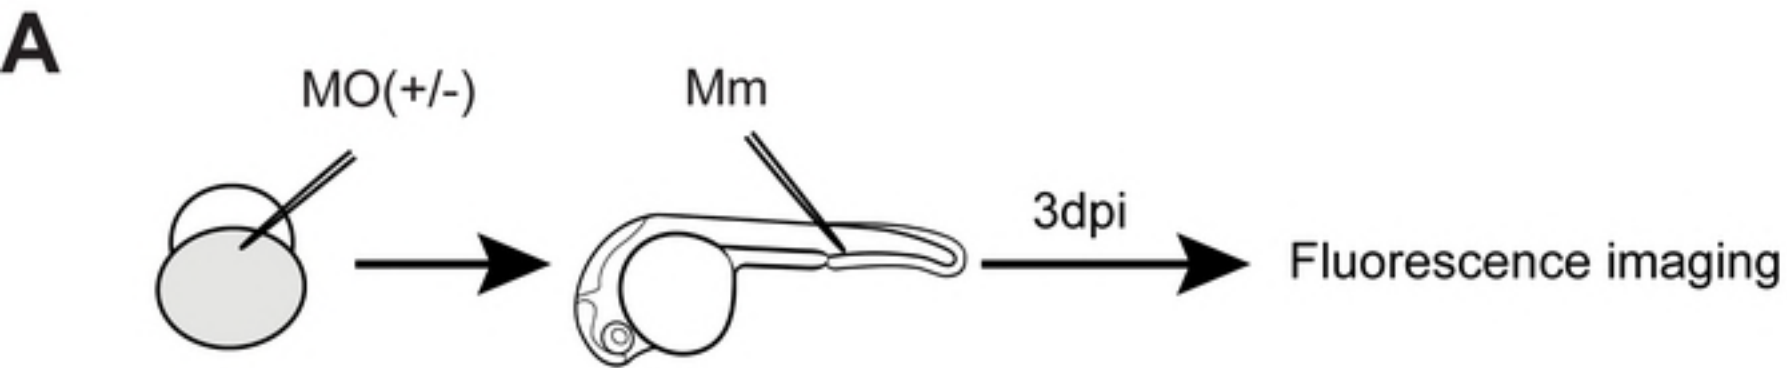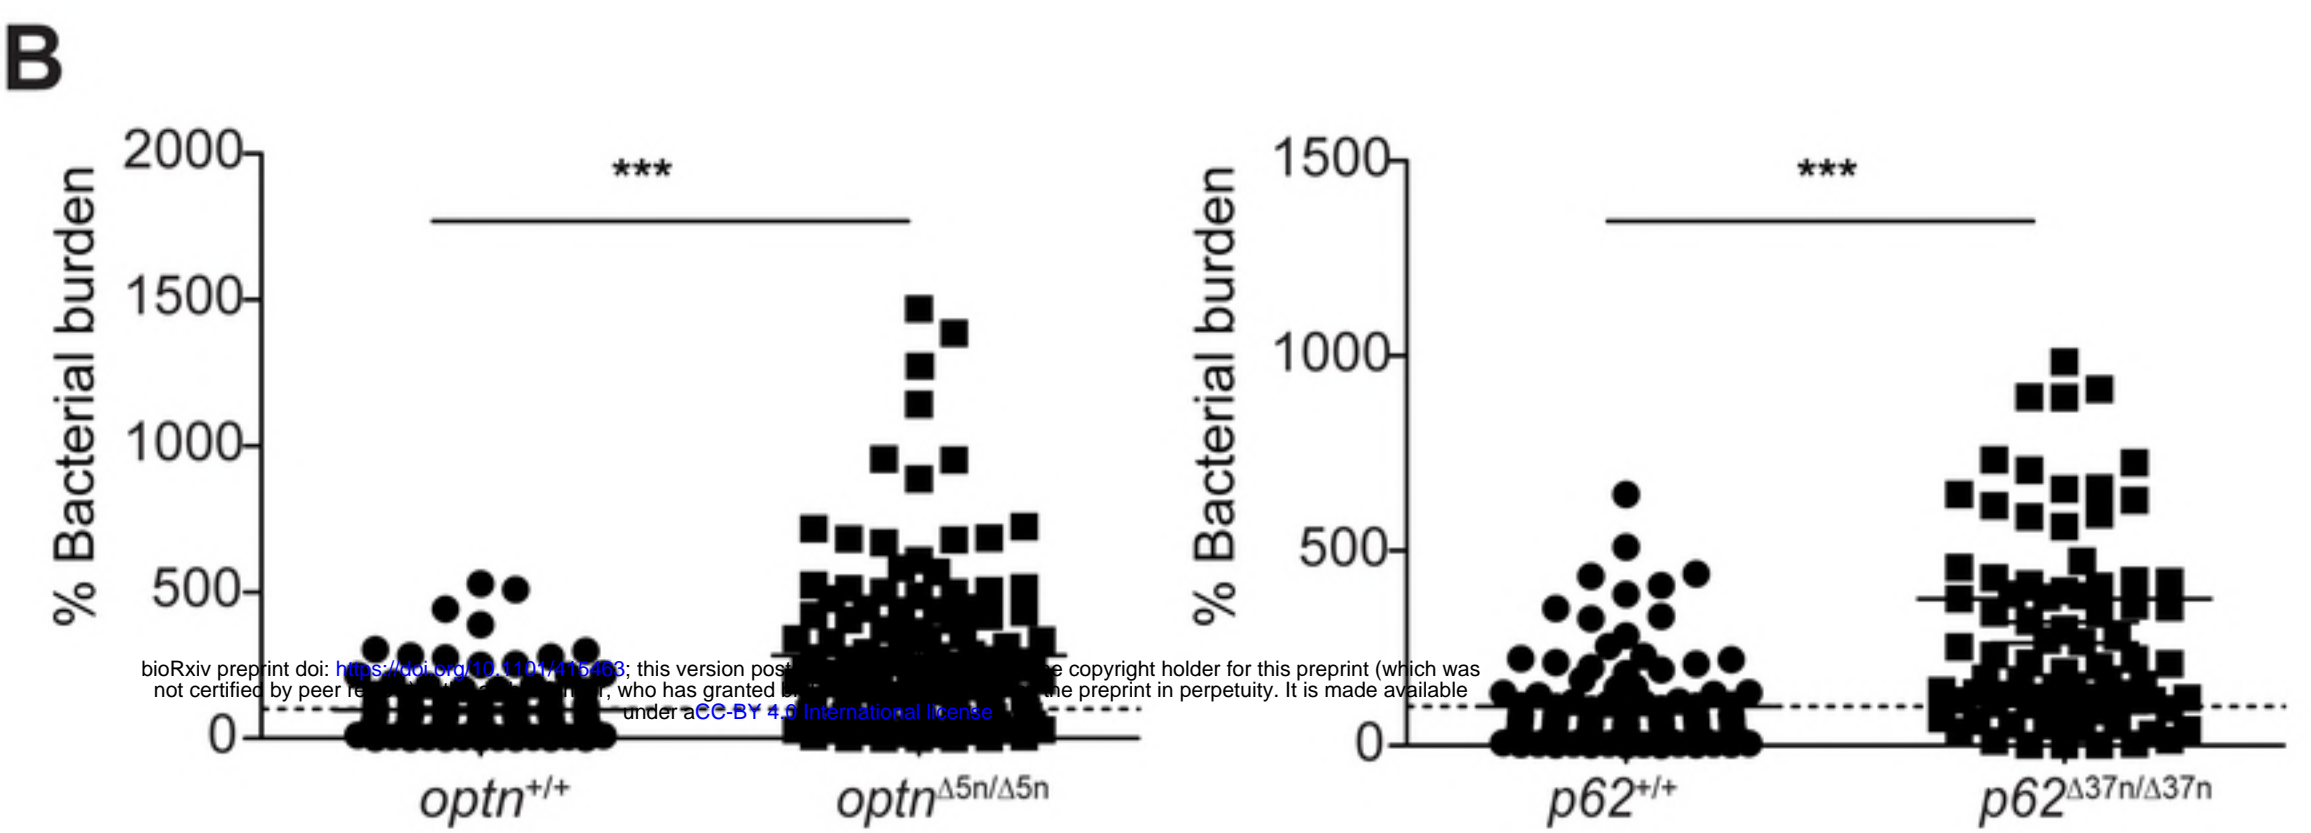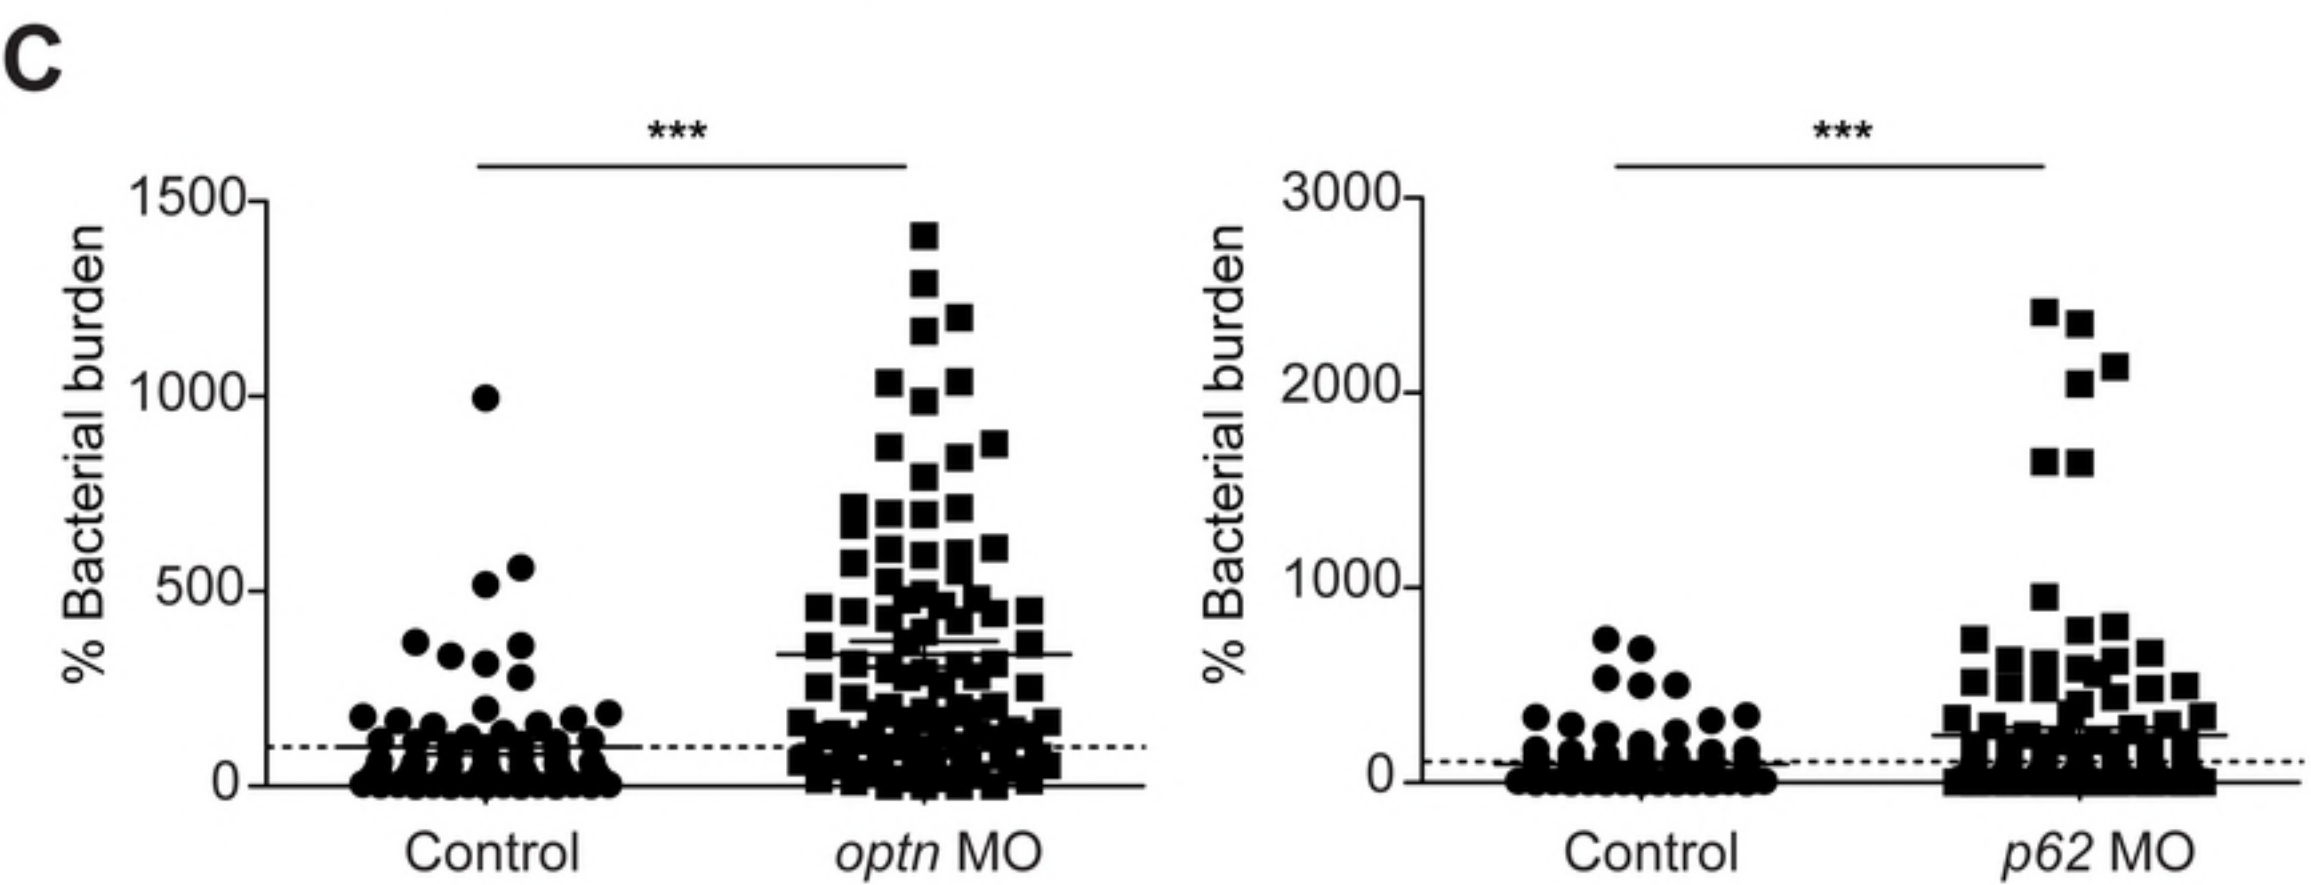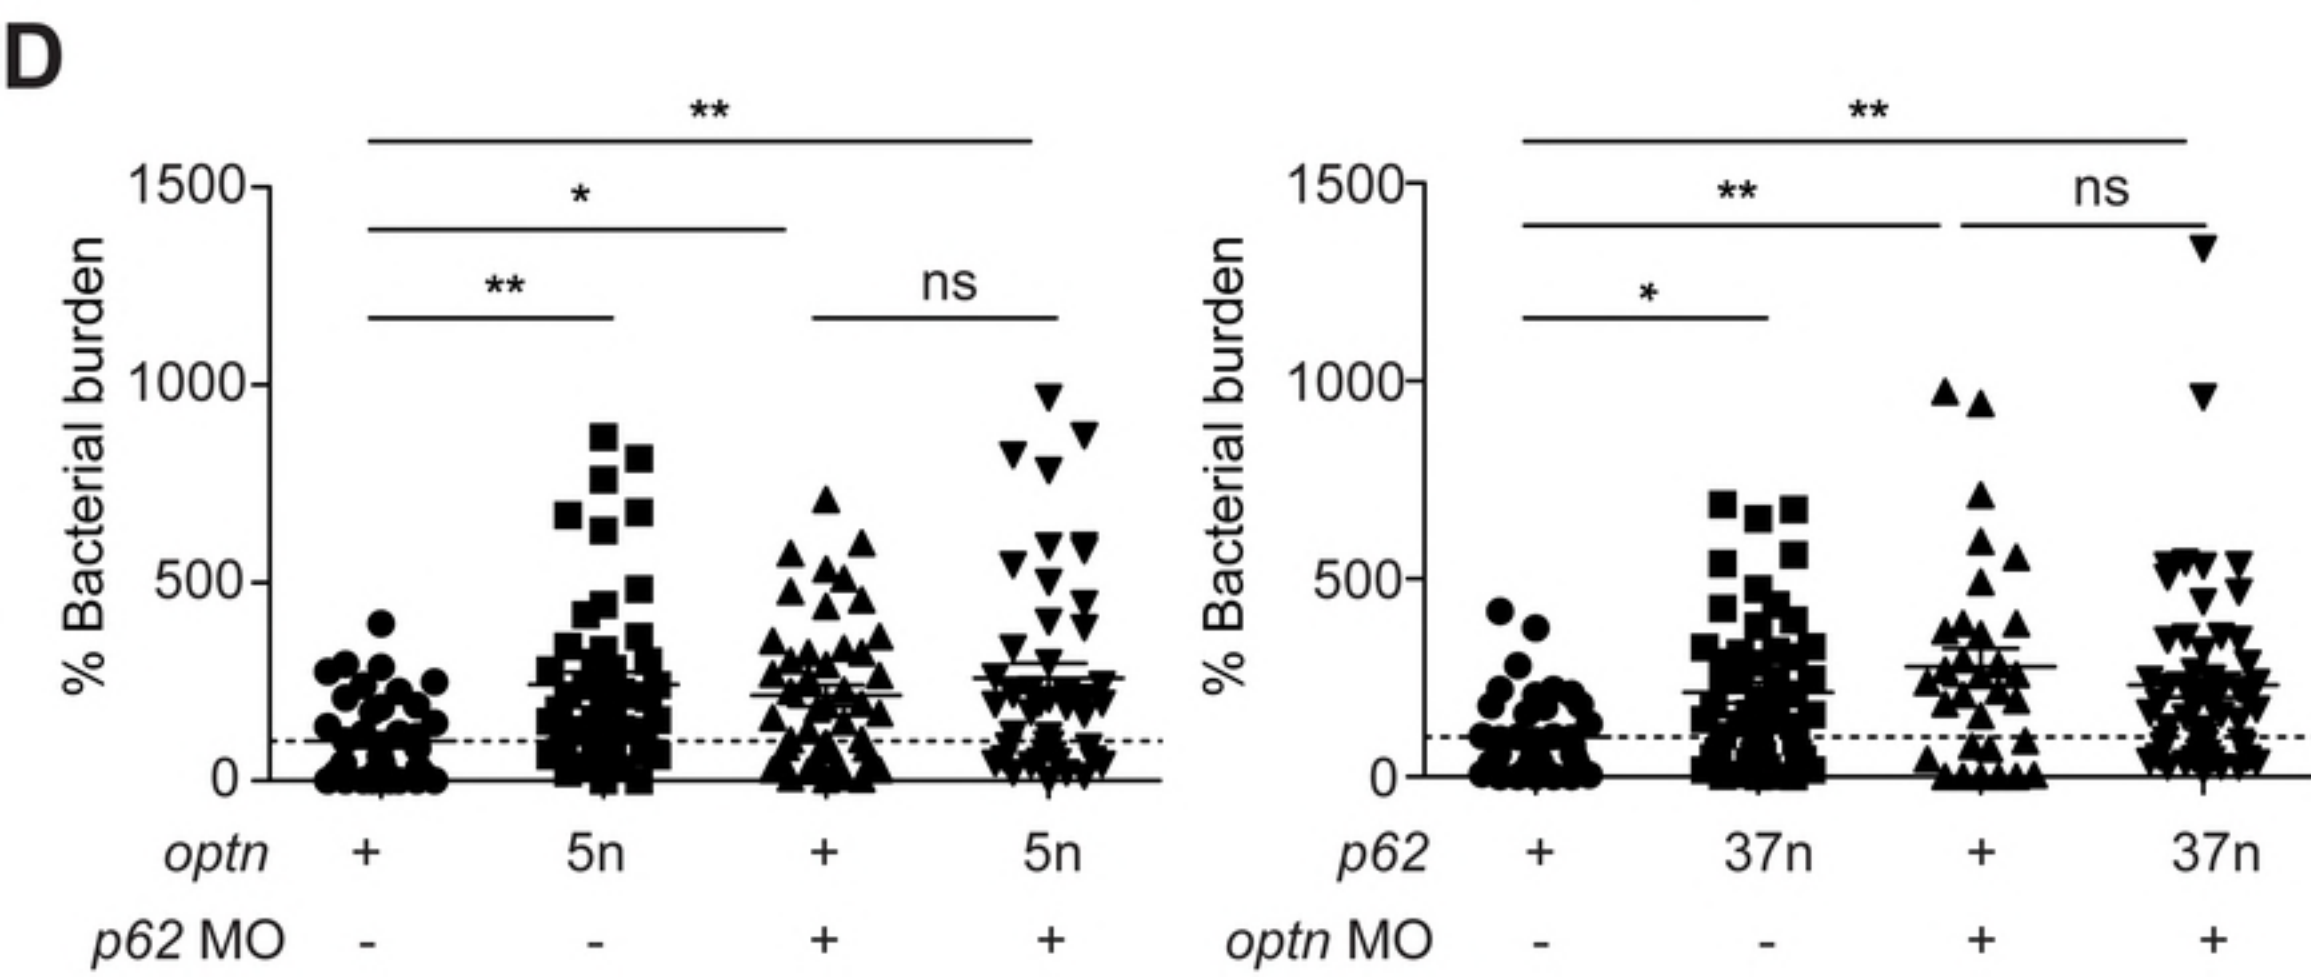

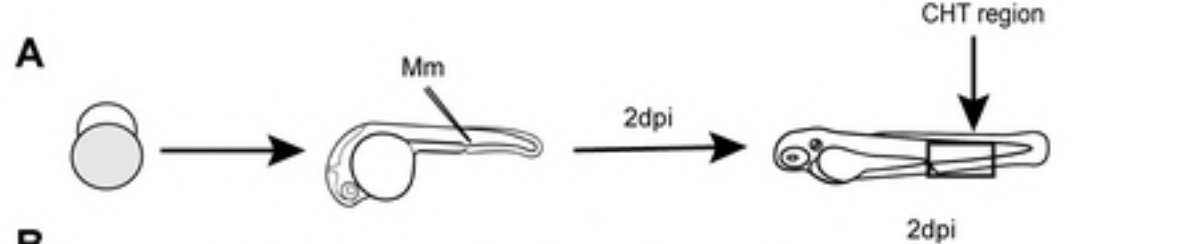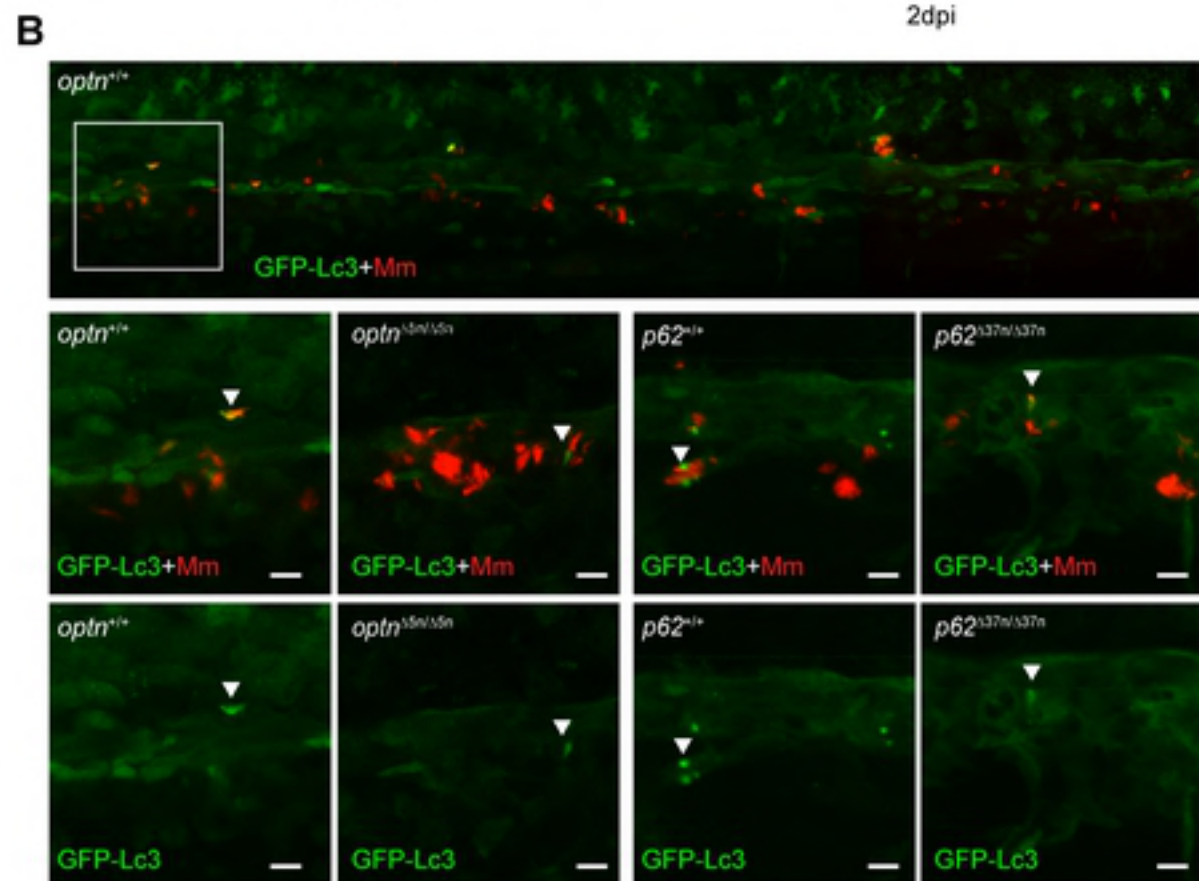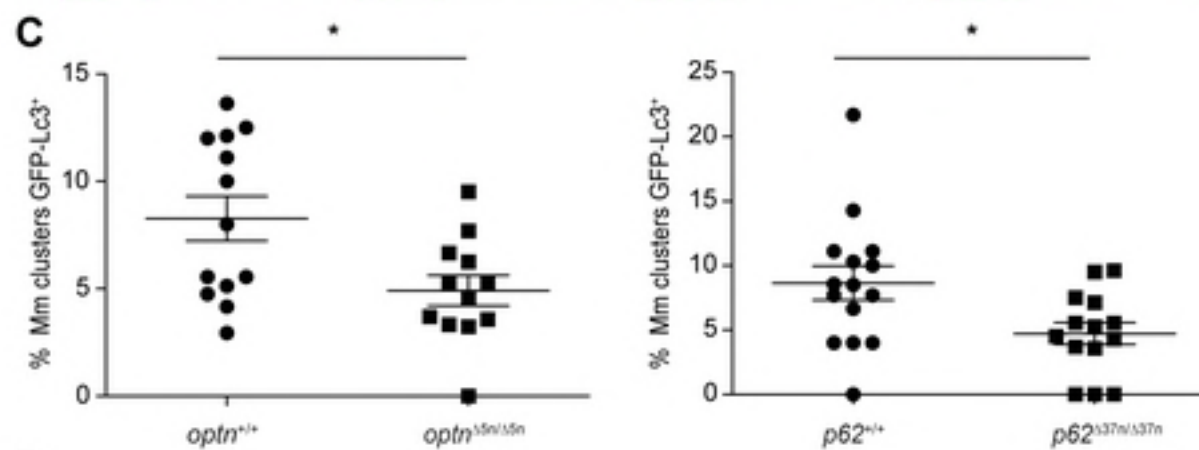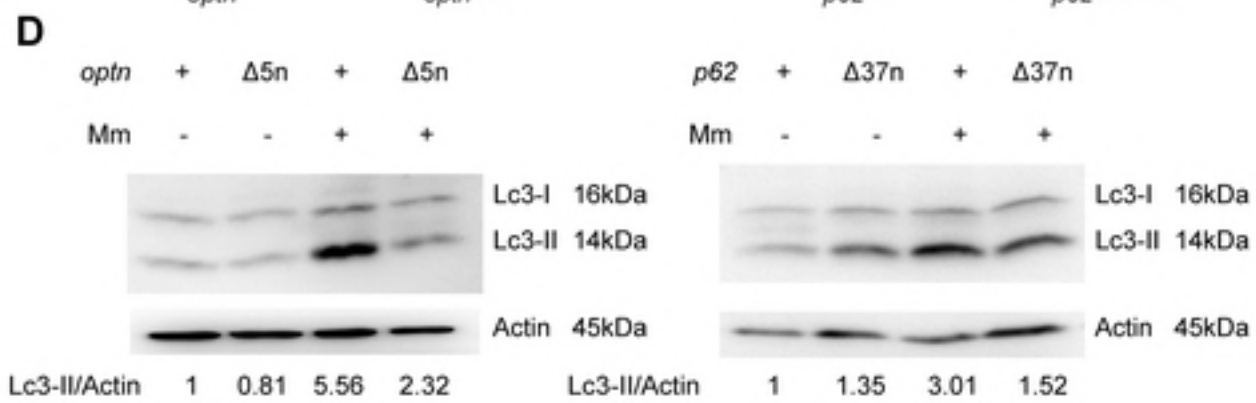

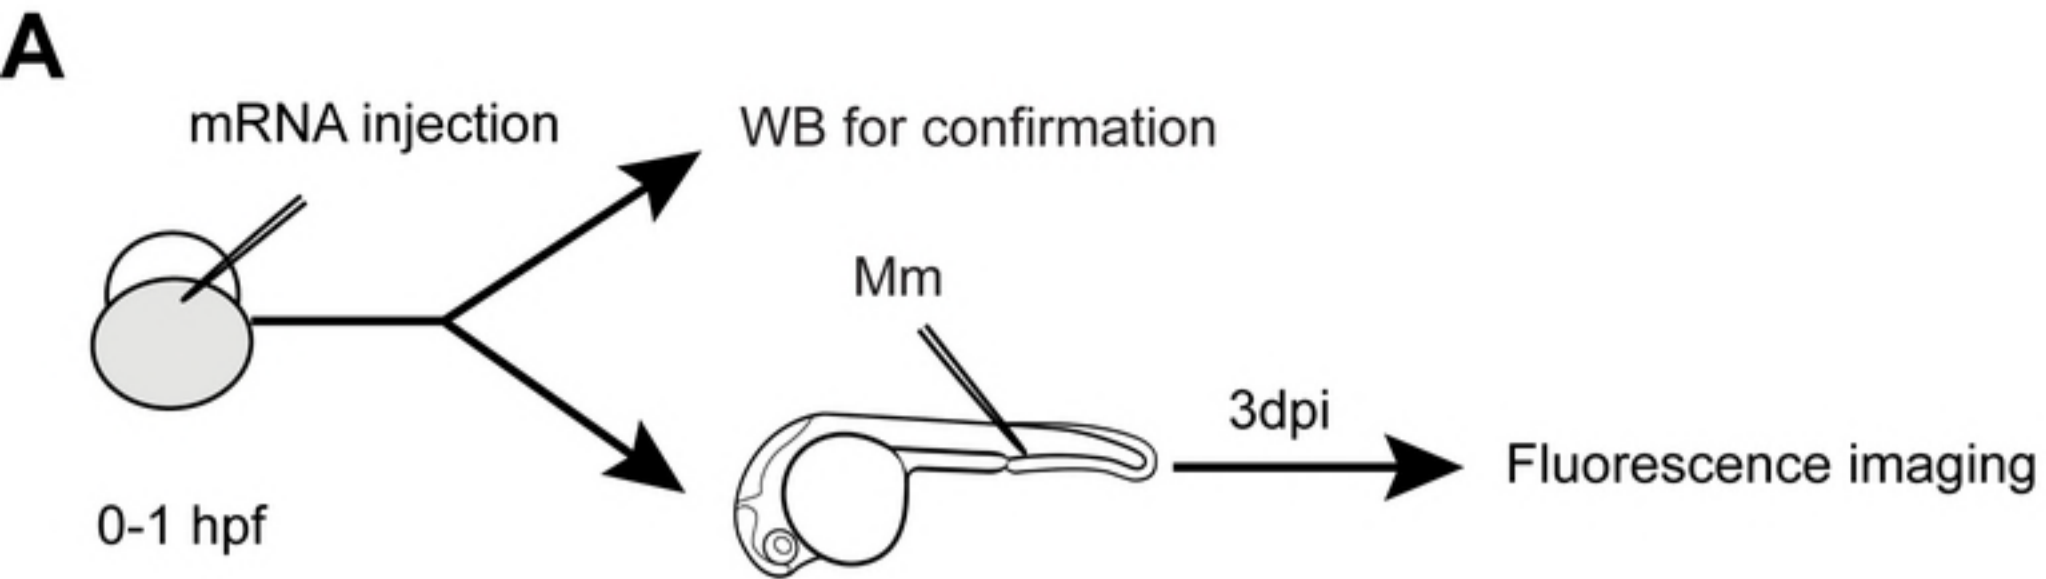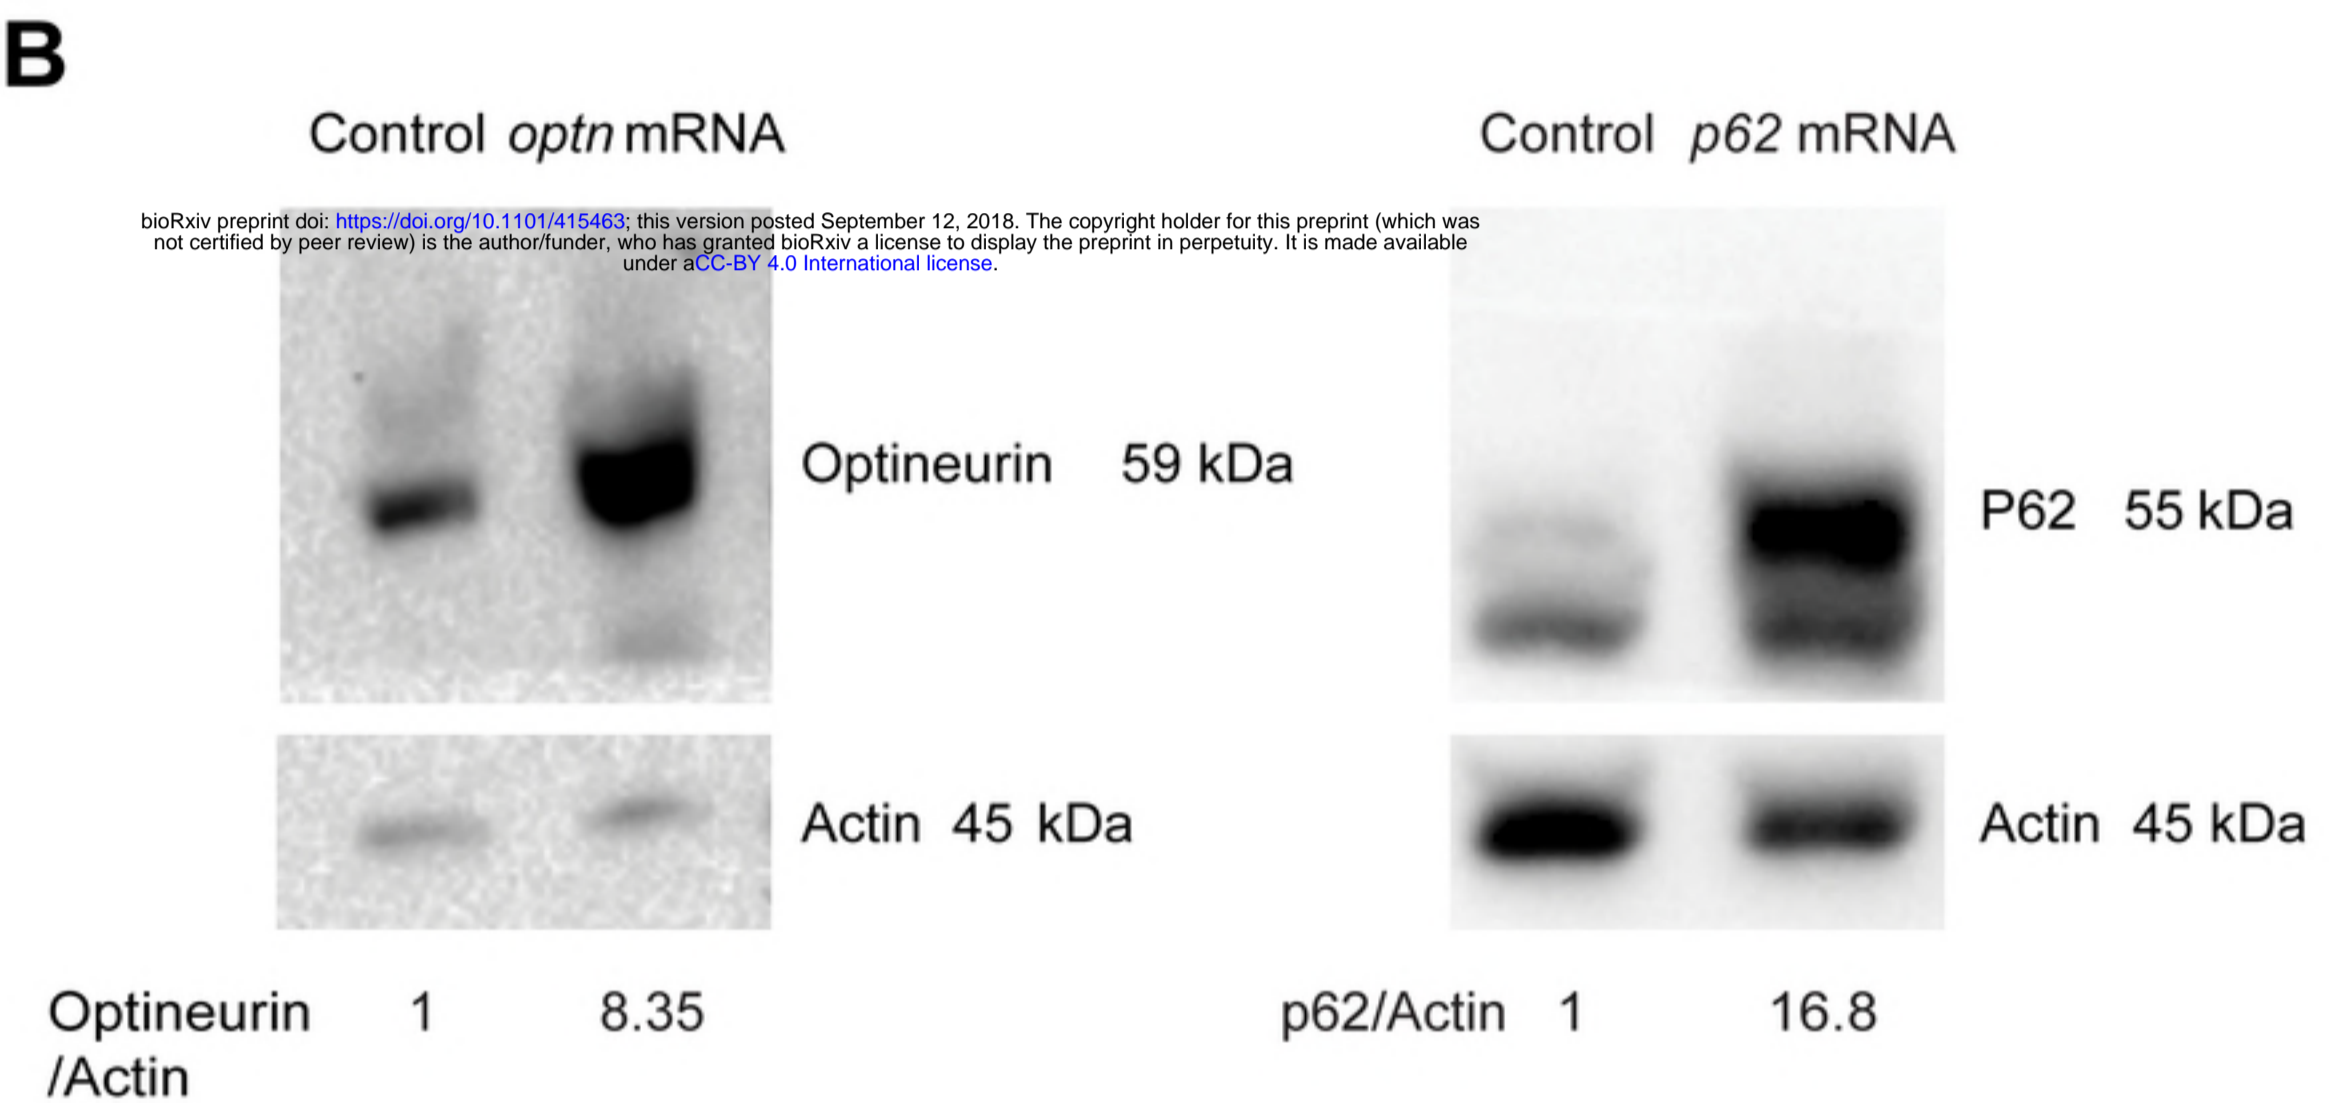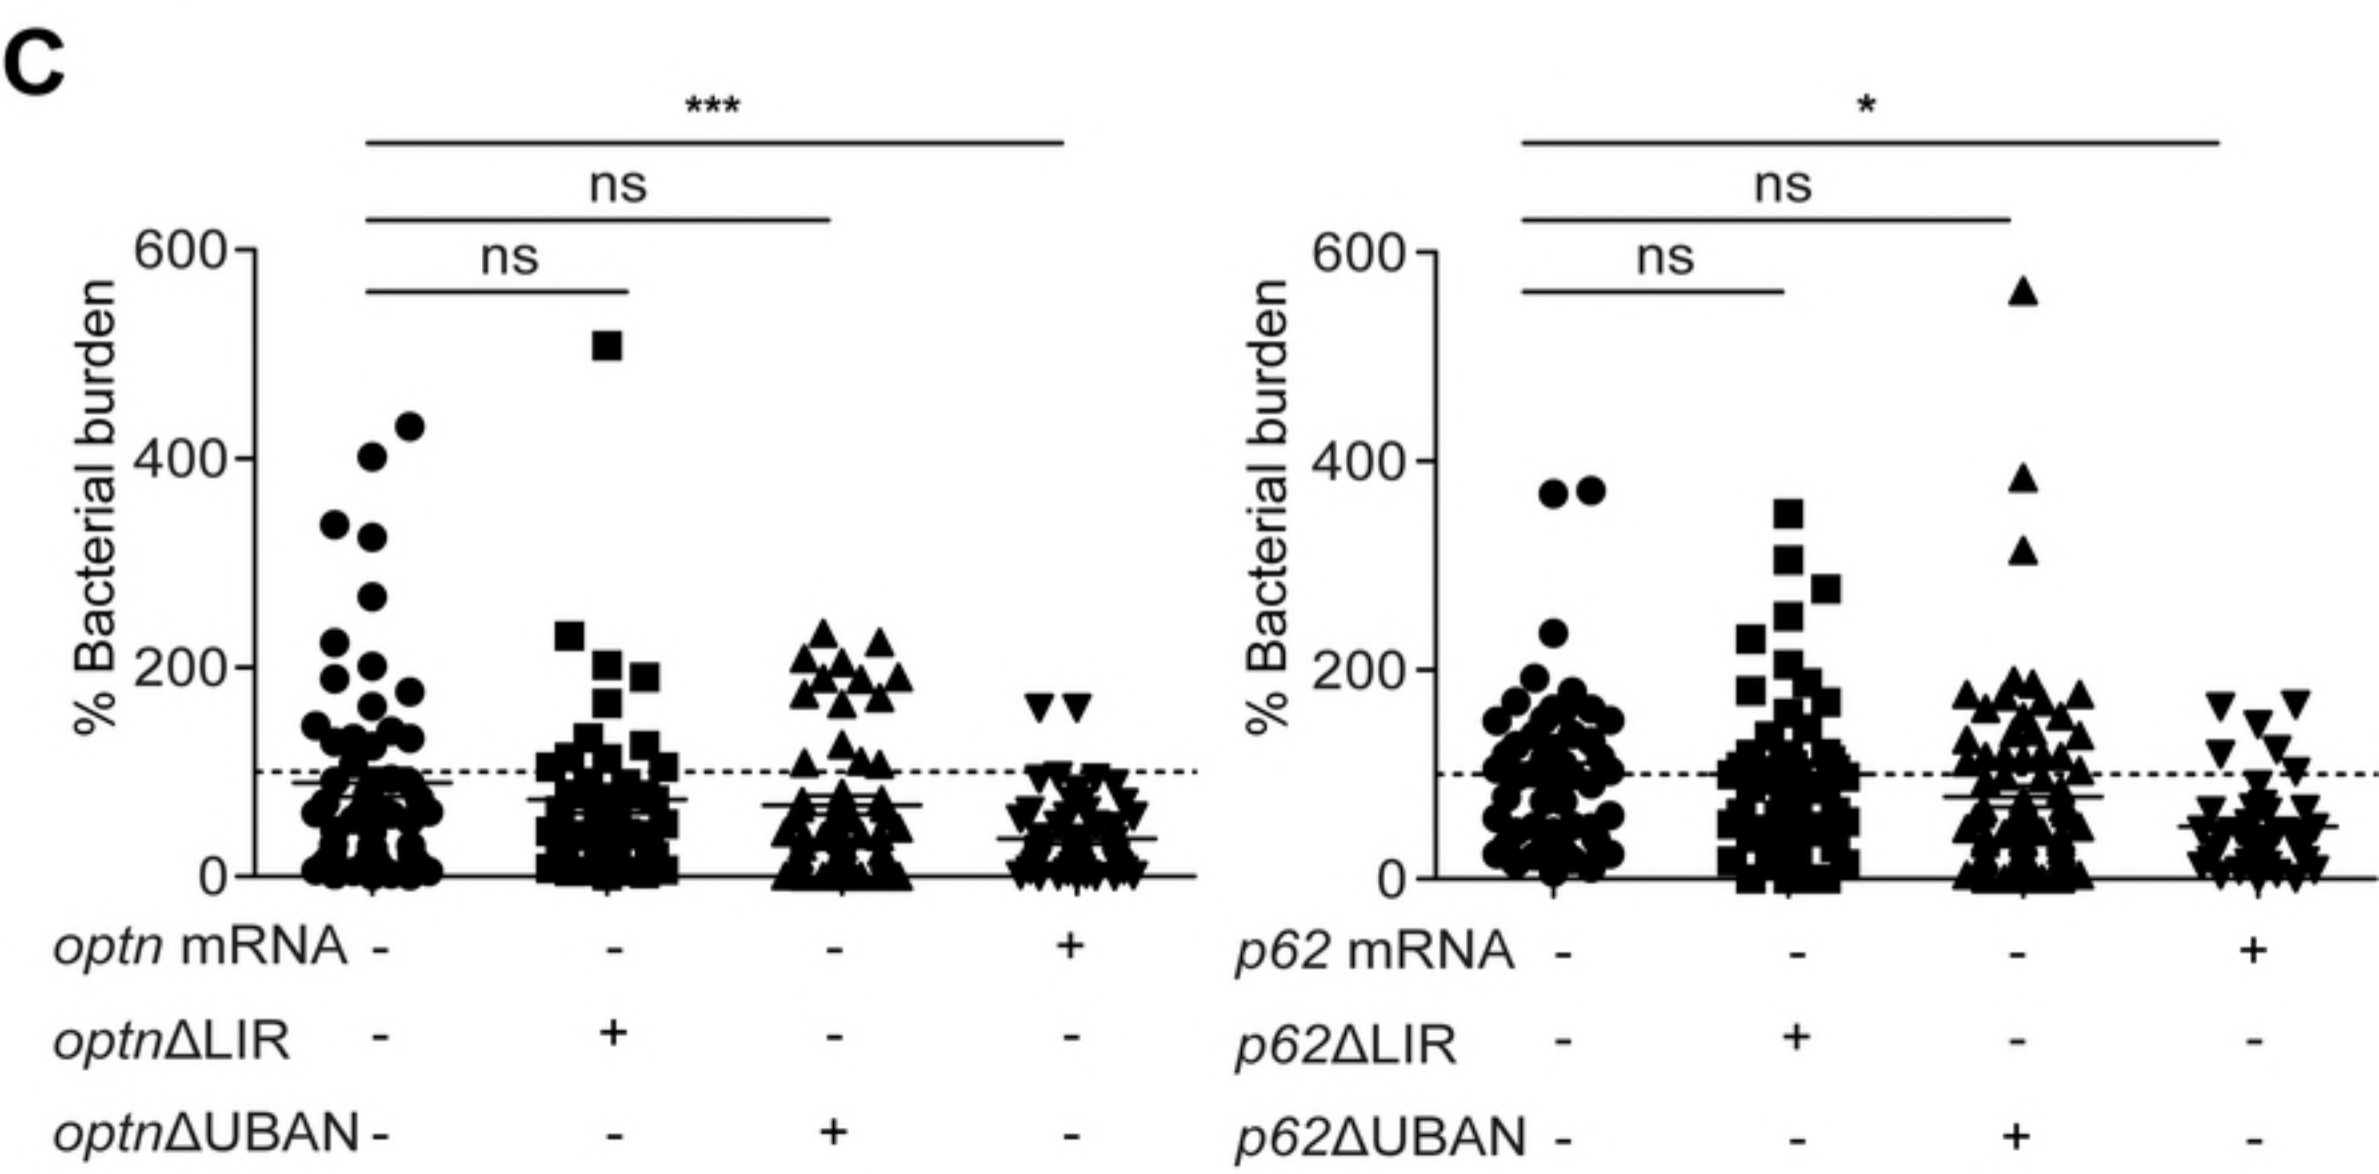

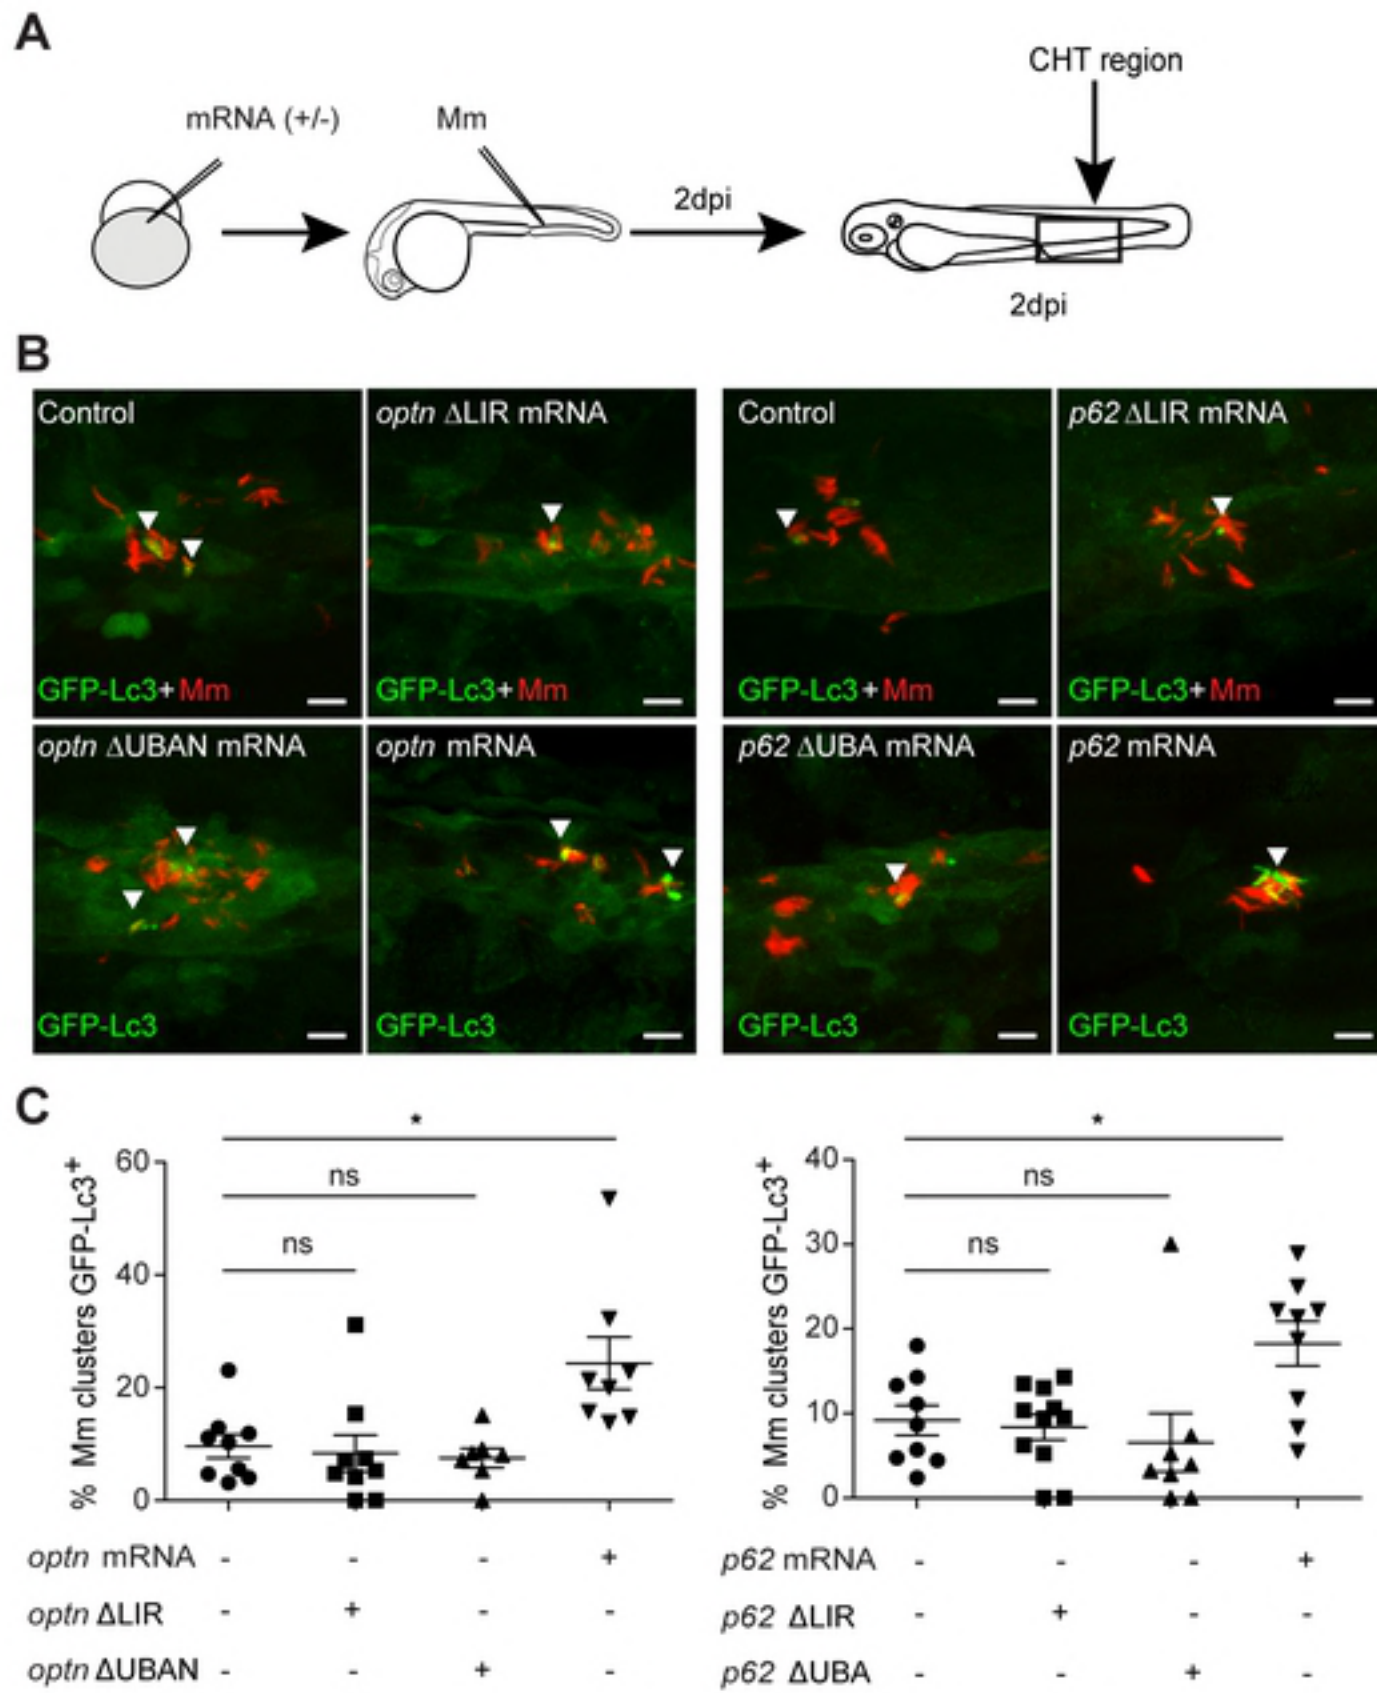

Source: http://biorxiv.org/content/10.1101/415463v1.full.pdf
